# Supplementary material for: Kinesin-1 and mitochondrial motility control by discrimination of structurally equivalent but distinct subdomains in Ran-GTP-binding domains of Ran-binding protein 2
Source: PubMed Central journal article supplement (PMC3718338; doi:10.1098/rsob.120183), 2013-03
Supplement: rsob120183-s1.pdf [file rsob120183-s1.pdf]

## **SUPPLEMENTARY MATERIAL**

### **Kinesin-1 and mitochondrial motility control by discrimination of structurally equivalent but distinct subdomains in Ran-GTP-binding domains of RanBP2**

Hemangi Patil<sup>1</sup>, Kyoung-in Cho<sup>1</sup>, James Lee<sup>1</sup>, Yi Yang<sup>1</sup>, Andrew Orry<sup>2</sup> and Paulo A Ferreira<sup>1,3,\*</sup>

<sup>1</sup> Department of Ophthalmology, Duke University Medical Center, Durham, NC 27710

<sup>2</sup> Molsoft, LLC; San Diego, CA 92121

<sup>3</sup> Department of Pathology, Duke University Medical Center, Durham, NC 27710

\* To whom correspondence should be addressed: Paulo A. Ferreira, Duke University Medical Center, DUEC 3802, 2351 Erwin Road, Durham, NC 27710, USA; Tel. (919)-684-8457, Fax: (919)-684-3826; E-mail: [paulo.ferreira@duke.edu](mailto:paulo.ferreira@duke.edu)

### **Supplementary Materials and Methods**

#### **Biophysical parameters definitions:**

1. **Motile event**; motility of a mitochondrion in anterograde or retrograde direction with a velocity > 300  $\mu\text{m}/\text{sec}$  between any two consecutive time frames.
2. **Stationary event**; stationary mitochondrion or motility of a mitochondrion of < 300  $\mu\text{m}/\text{sec}$  in either direction between any two or more consecutive time frames.
3. **Absolute duration of pause**; time duration of stationary event between two motile events of a mitochondrion between a minimum of two consecutive time frames.
4. **Frequency of change of direction**; number of times a motile mitochondrion changes from anterograde to retrograde direction or vice versa during a total of 121 frames (60 seconds).
5. **Persistency of motility**; duration of a continuous (non-stop) motile event of a mitochondrion between two or more time frames.
6. **Average velocity**; the total trajectory distance traveled by a mitochondrion divided by its trajectory time during a total of 121 frames (excluding pauses).
7. **Absolute velocity**; the trajectory distance of a single non-stop run of a mitochondrion divided by its trajectory time.
8. **Total displacement**; the total distance traveled by a motile mitochondrion during 121 frames (60 seconds).

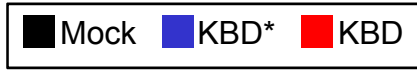

**(a) Stationary Events (%)**

|      | 8 hr   | 10 hr  | 12 hr  |
|------|--------|--------|--------|
| KBD  | 76.85* | 66.11* | 49.58* |
| KBD* | 86.77  | 85.95  | 81.81  |
| Mock | 90.08  | 86.77  | 84.29  |

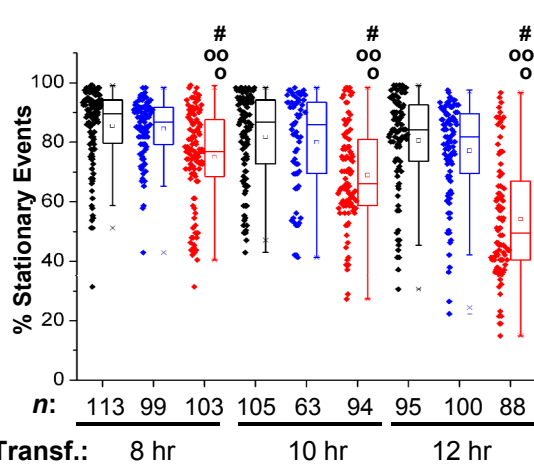

**(b) Total Anterograde Displacement ( $\mu\text{m}/\text{min}$ )**

|      | 8 hr  | 10 hr | 12 hr |
|------|-------|-------|-------|
| KBD  | 1.53* | 1.95* | 3.74* |
| KBD* | 0.72  | 0.96  | 1.08  |
| Mock | 0.53  | 0.87  | 1.01  |

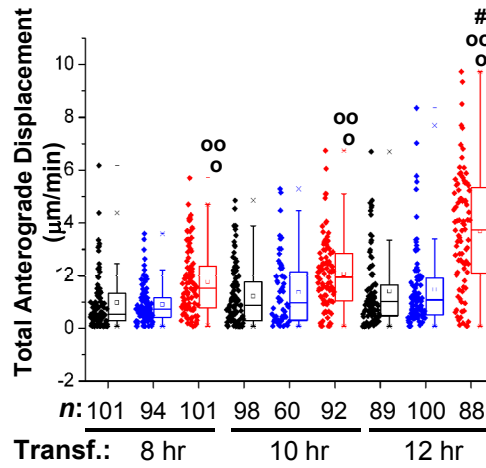

**(c) Total Retrograde Displacement ( $\mu\text{m}$ )**

|      | 8 hr  | 10 hr | 12 hr |
|------|-------|-------|-------|
| KBD  | 1.48* | 2.36* | 4.08* |
| KBD* | 0.97  | 1.09  | 1.31  |
| Mock | 0.58  | 0.85  | 1.02  |

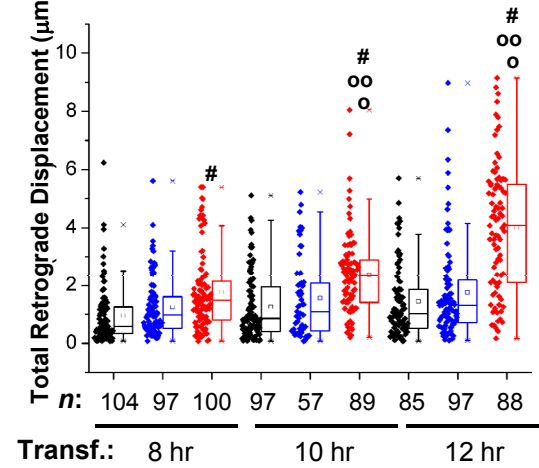

**(d) Total Displacement ( $\mu\text{m}$ )**

|      | 8 hr  | 10 hr | 12 hr |
|------|-------|-------|-------|
| KBD  | 2.96* | 4.28* | 8.18* |
| KBD* | 1.75  | 1.79  | 2.22  |
| Mock | 1.11  | 1.48  | 1.9   |

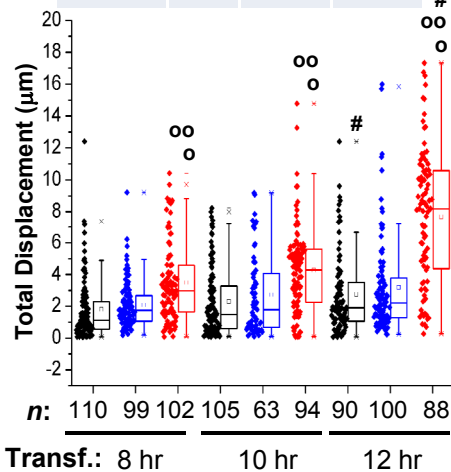

**(e) Frequency of Anterograde Motility (events/min)**

|      | 8 hr | 10 hr | 12 hr |
|------|------|-------|-------|
| KBD  | 14*  | 17*   | 29*   |
| KBD* | 6.5  | 9     | 10    |
| Mock | 6    | 8.5   | 9     |

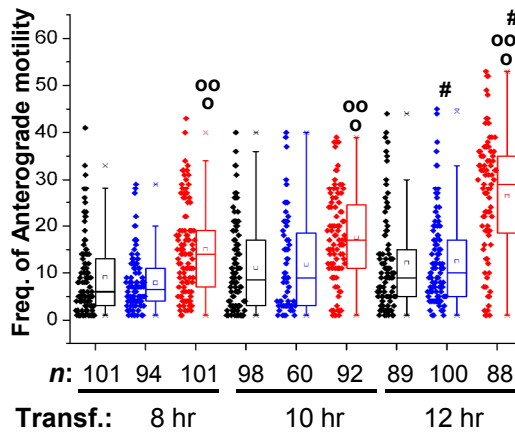

**(f) Frequency of Retrograde Motility (events/min)**

|      | 8 hr | 10 hr | 12 hr |
|------|------|-------|-------|
| KBD  | 13*  | 22*   | 30.5* |
| KBD* | 8    | 10    | 12    |
| Mock | 6    | 8     | 9     |

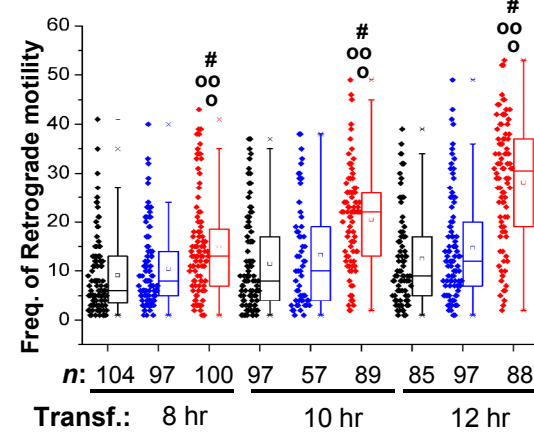

■ Mock ■ KBD\* ■ KBD

(g) **Absolute R-R Pause (sec)**

|      | 8 hr | 10 hr | 12 hr |
|------|------|-------|-------|
| KBD  | 1.5* | 1*    | 0.5*  |
| KBD* | 2    | 1.5   | 1.5   |
| Mock | 2.5  | 1.5   | 1.5   |

(h) **Absolute Duration of Pause (sec)**

|      | 8 hr | 10 hr | 12 hr |
|------|------|-------|-------|
| KBD  | 1.5* | 1*    | 1*    |
| KBD* | 2    | 1.5   | 1.5   |
| Mock | 2    | 1.5   | 1.5   |

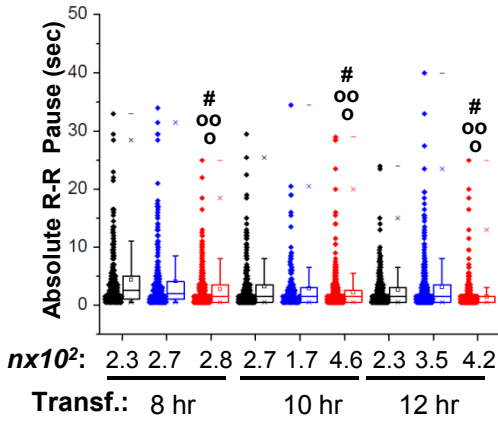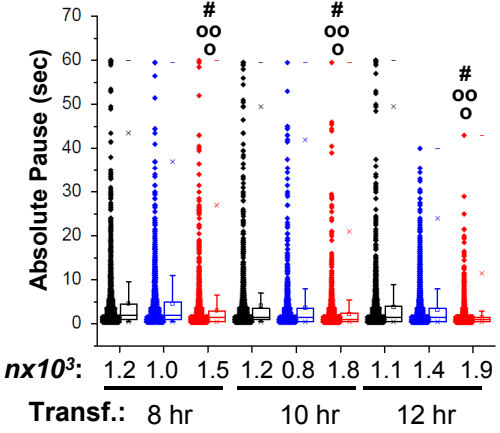

(i) **Persistency of Retrograde Motility**

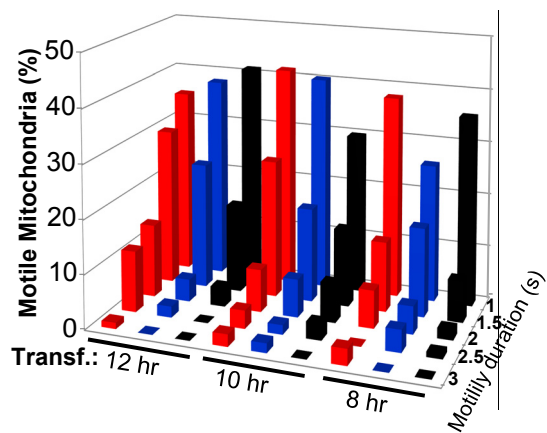

(j) **Total Motility Persistency**

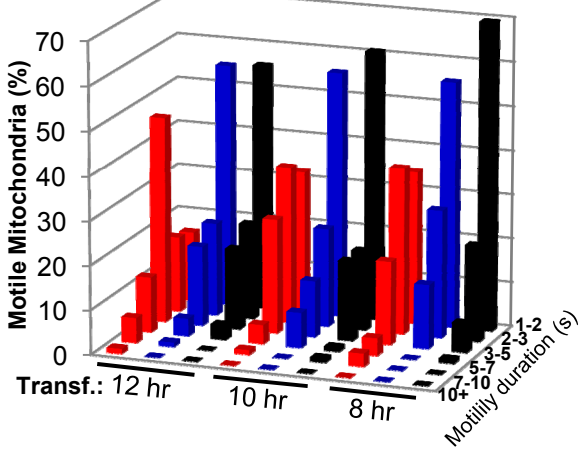

(k) **Average Velocity ( $\mu\text{m}/\text{sec}$ )**

|      | 8 hr  | 10 hr | 12 hr |
|------|-------|-------|-------|
| KBD  | 0.45  | 0.43  | 0.50* |
| KBD* | 0.46* | 0.44* | 0.42  |
| Mock | 0.38  | 0.40  | 0.43  |

(l) **Average Retrograde Velocity ( $\mu\text{m}/\text{sec}$ )**

|      | 8 hr  | 10 hr | 12 hr |
|------|-------|-------|-------|
| KBD  | 0.44  | 0.43  | 0.52* |
| KBD* | 0.46* | 0.44* | 0.43  |
| Mock | 0.37  | 0.41  | 0.44  |

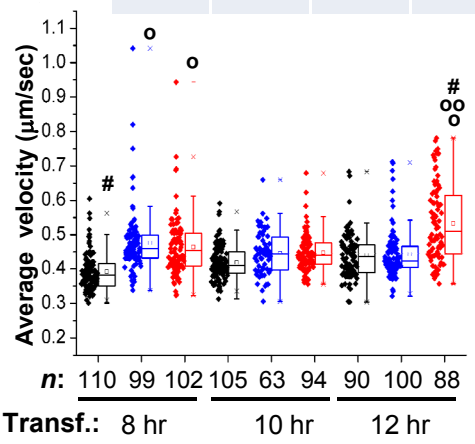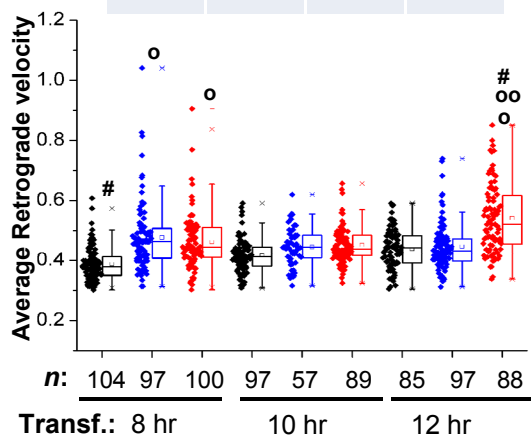

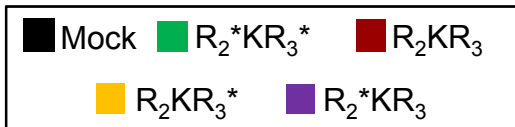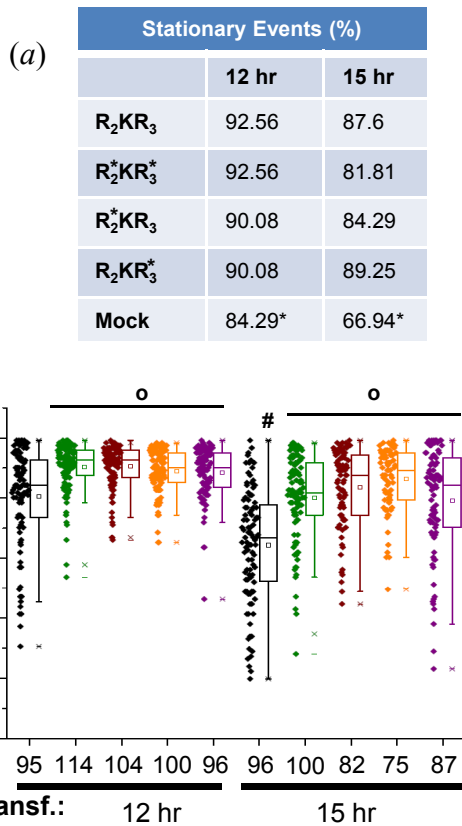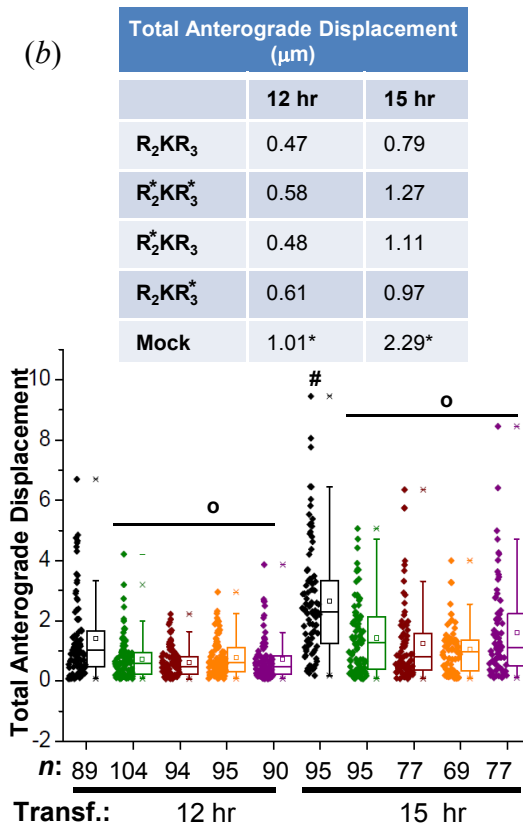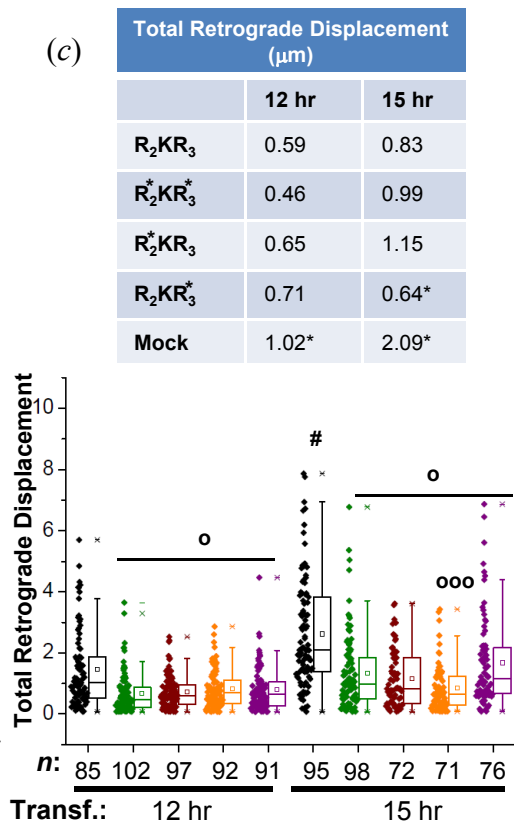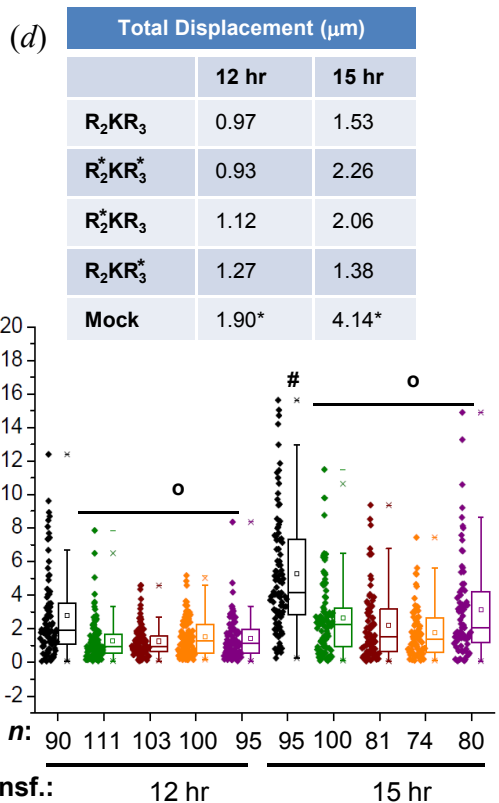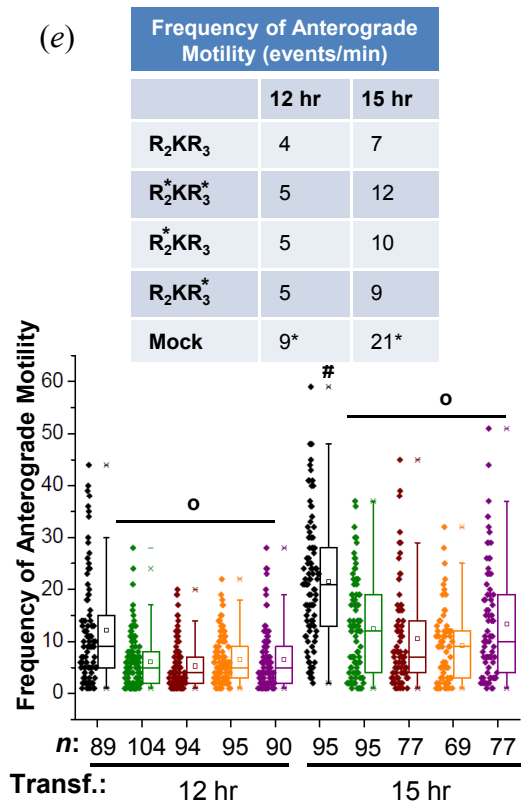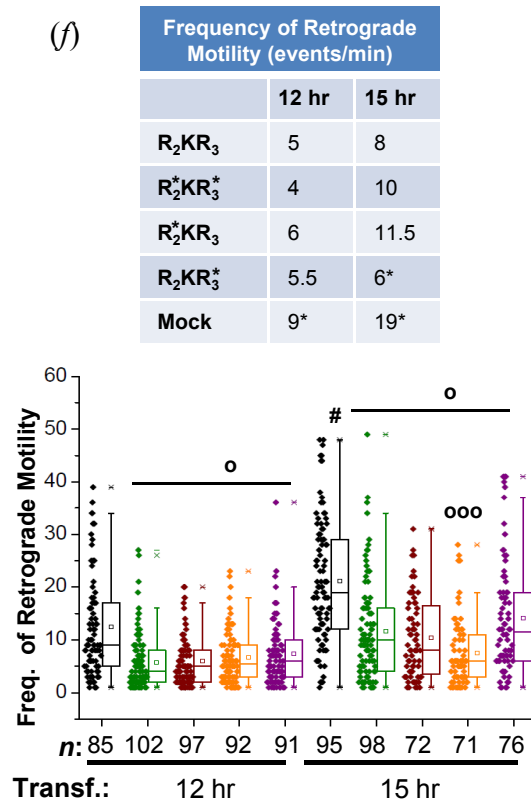

Supplementary Figure S2

(g)

| Absolute R-R Pause (sec)          |       |       |
|-----------------------------------|-------|-------|
|                                   | 12 hr | 15 hr |
| R <sub>2</sub> KR <sub>3</sub>    | 3     | 2     |
| R <sub>2</sub> *KR <sub>3</sub> * | 3     | 2     |
| R <sub>2</sub> *KR <sub>3</sub>   | 2.5   | 1.5   |
| R <sub>2</sub> KR <sub>3</sub> *  | 3     | 2     |
| Mock                              | 1.5*  | 1*    |

(h)

| Absolute Duration of Pause (sec)  |       |       |
|-----------------------------------|-------|-------|
|                                   | 12 hr | 15 hr |
| R <sub>2</sub> KR <sub>3</sub>    | 3.5   | 1.5   |
| R <sub>2</sub> *KR <sub>3</sub> * | 3.5   | 1.5   |
| R <sub>2</sub> *KR <sub>3</sub>   | 2.5   | 1.5   |
| R <sub>2</sub> KR <sub>3</sub> *  | 3     | 2     |
| Mock                              | 1.5*  | 1*    |

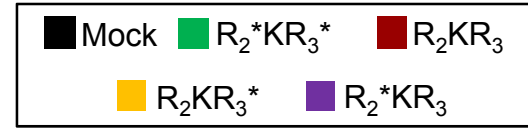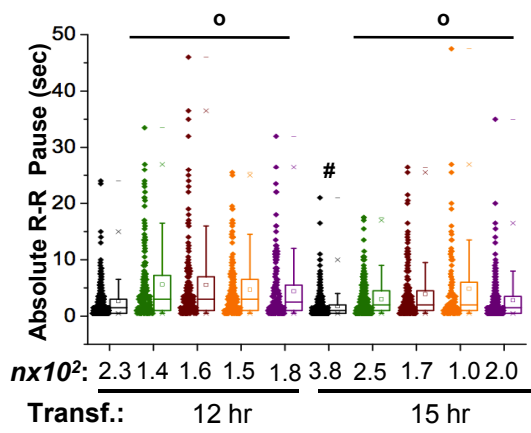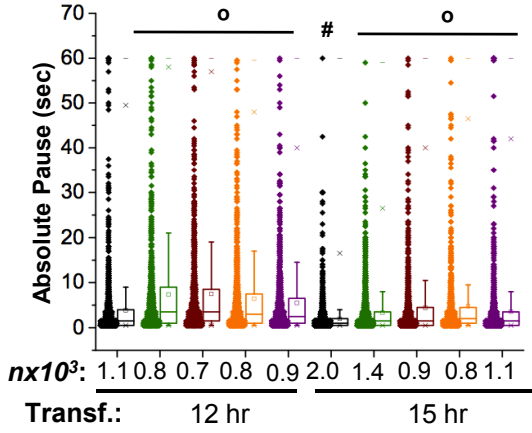

(i) Persistency of Retrograde Motility

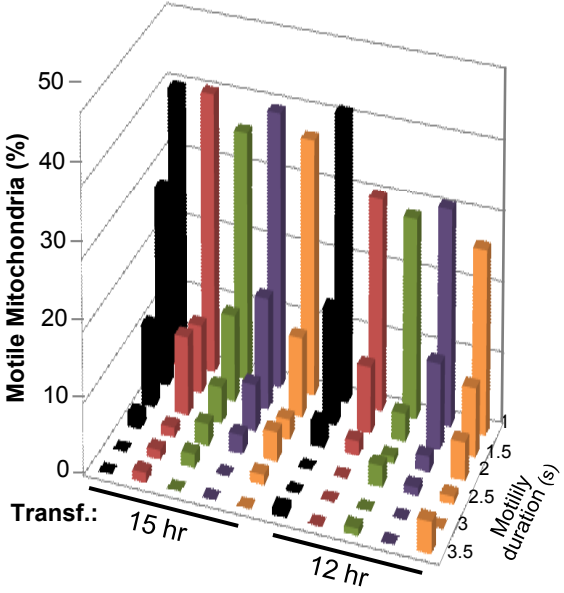

(j) Total Motility Persistency

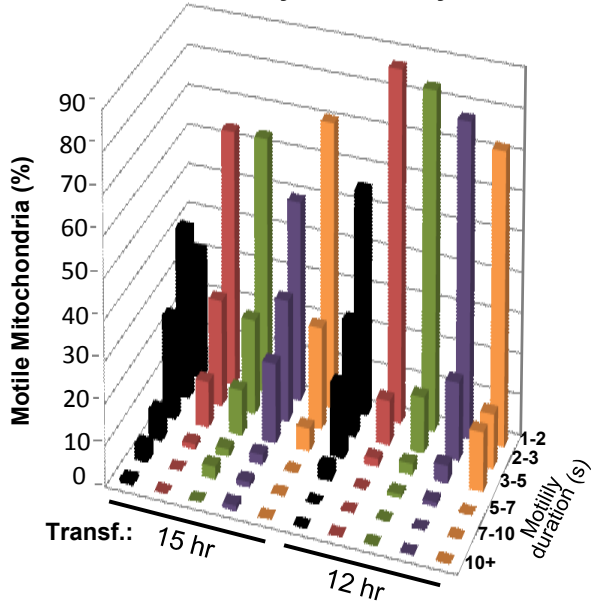

(k)

| Average Velocity (μm/sec)         |       |       |
|-----------------------------------|-------|-------|
|                                   | 12 hr | 15 hr |
| R <sub>2</sub> KR <sub>3</sub>    | 0.47* | 0.41* |
| R <sub>2</sub> *KR <sub>3</sub> * | 0.42  | 0.41* |
| R <sub>2</sub> *KR <sub>3</sub>   | 0.41  | 0.43  |
| R <sub>2</sub> KR <sub>3</sub> *  | 0.48* | 0.42  |
| Mock                              | 0.43  | 0.44  |

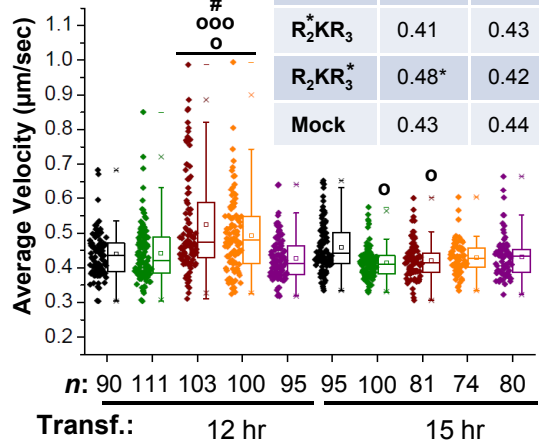

(l)

| Average Retrograde Velocity (μm/sec) |       |       |
|--------------------------------------|-------|-------|
|                                      | 12 hr | 15 hr |
| R <sub>2</sub> KR <sub>3</sub>       | 0.46* | 0.40  |
| R <sub>2</sub> *KR <sub>3</sub> *    | 0.39  | 0.41  |
| R <sub>2</sub> *KR <sub>3</sub>      | 0.40  | 0.42  |
| R <sub>2</sub> KR <sub>3</sub> *     | 0.48* | 0.42  |
| Mock                                 | 0.44  | 0.44  |

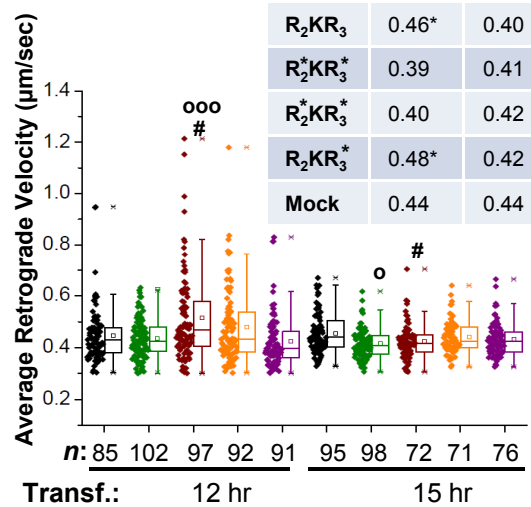

## Supplementary Figure Legends

**Supplementary Figure S1.** Up-regulation of biophysical parameters of mitochondrial kinetics by KBD of RanBP2. Dot-box plot analyses are shown in (*a-h*) and (*k-l*). The tables accompanying dot-box plots represent the corresponding median values for the represented data sets. KBD compared to KBD\* and mock transfected cells causes temporally a decrease of stationary events (*a*), an increase of total anterograde (*b*) and retrograde displacements (*c*), an increase in total displacement (*d*), an increase in frequency of anterograde (*e*) and retrograde motilities (*f*), a decrease in absolute pauses between retrograde (*g*) and any motility events (*h*), an increase in average (*k*) and retrograde velocities (*l*) of mitochondria at 12 hours post-transfection. (*i*) 3D-histogram showing that an increase in the persistency of mitochondrial retrograde motility is contingent upon KBD, but not KBD\* or mock-transfected cells (chi square contingency test,  $0.001 < P < 0.01$ ,  $\chi^2 = 23.77$ , Cramer's contingency coefficient  $\phi = 0.46$ ), and upon the time of post-transfection (chi square contingency test,  $p < 0.05$ ,  $\chi^2 = 18.76$ , Cramer's contingency coefficient  $\phi = 0.40$ ); (*j*) 3D-histogram showing that an increase in the persistency of total mitochondrial motility is contingent upon KBD, but not KBD\* or mock-transfected cells (chi square contingency test,  $p < 0.001$ ,  $\chi^2 = 63.15$ , Cramer's contingency coefficient  $\phi = 0.68$ ) and upon the time of post-transfection (chi square contingency test,  $p < 0.001$ ,  $\chi^2 = 42.09$ , Cramer's contingency coefficient  $\phi = 0.54$ ). Legends: \*, median significantly different (Mood's median test,  $\alpha = 0.01$ ); °, °° and # are mitochondrial pools significantly different from non-transfected (°), KBD\* (°°) and other times of transfection with the same construct (#), Mann Whitney test,  $p < 0.0001$ ; *n*, number of mitochondria; Mock, mock-transfected; KBD and KBD\* are wild-type and mutant kinesin-binding domain of RanBP2, respectively. *a-h* and *k-l*, Mann-Whitney test,  $P < 0.001$ .

**Supplementary Figure S2.** Down-regulation and stereochemical selectivity of multiple biophysical parameters of mitochondrial motility by wild-type and mutant R<sub>2</sub>KR<sub>3</sub> constructs of RanBP2. Dot-box plot analyses are shown in *a-h* and *k-l*. The tables accompanying dot-box plots represent the corresponding median values for the represented data sets. Wild-type R<sub>2</sub>KR<sub>3</sub> and mutant constructs thereof with the

W→R mutation in the WKER motif of RBD<sub>2</sub> (R<sup>\*</sup><sub>2</sub>KR<sub>3</sub>), RBD<sub>3</sub> (R<sub>2</sub>KR<sup>\*</sup><sub>3</sub>) or both (R<sup>\*</sup><sub>2</sub>KR<sup>\*</sup><sub>3</sub>) compared with mock transfected cells cause temporally an increase of stationary events (*a*), a decrease of total anterograde (*b*) and retrograde displacements (*c*), a decrease in total displacement (*d*), a decrease in frequency of anterograde (*e*) and retrograde motilities (*f*), an increase in absolute pauses between retrograde (*g*) and any motility events (*h*), a decrease in retrograde (*k*) and average velocities (*l*) of mitochondria selectively in R<sub>2</sub>KR<sub>3</sub> and R<sub>2</sub>KR<sup>\*</sup><sub>3</sub> transfected cells at 12 hours post-transfection. (*i*) 3D-histogram showing that the persistency of retrograde motility is neither contingent upon any R<sub>2</sub>KR<sub>3</sub> constructs (chi square contingency test,  $P>0.05$ ) nor upon the time of post-transfection (chi square contingency test,  $P>0.05$ ). (*j*) A reduction in persistency of mitochondrial motility is significantly contingent upon transfection of any upon R<sub>2</sub>KR<sub>3</sub> construct (chi square contingency test,  $p<0.001$ ,  $\chi^2=63.49$ , Cramer's contingency coefficient  $\phi=0.32$ ). The persistency of mitochondrial motility of mock-transfected cells is contingent upon time of post-transfection (chi square contingency test,  $p<0.05$ ,  $\chi^2=14.99$ , Cramer's contingency coefficient  $\phi=0.28$ ). Persistency of mitochondrial motility of any RKR construct is not contingent upon time of post-transfection (chi square contingency test,  $p>0.05$ ). Legends: \*, median significantly different (Mood's median test,  $\alpha=0.01$ ); °, °°° and # are mitochondrial pools significantly different from non-transfected (°), R<sub>2</sub>KR<sub>3</sub> constructs (°°°) and other times of transfection with the same construct (#), Mann Whitney test,  $p<0.0001$ ; *n*, number of mitochondria; Mock, mock-transfected. (*a-h*) and (*k-l*)

**Movie S1.** 3T3 cell transfected with YFP-KBD for 12 hours and stained with MitoTracker is shown. Images were analyzed by time-lapse and epifluorescence microscopy. Frames were taken every 0.5 sec for 1 min. Still image of Movie S1 is shown in figure 2*a* of the main text.

**Movie S1a.** Region of interest of a 3T3 cell shown in Movie S1 (lower panel of figure 2a of the main text) transfected with YFP-KBD for 12 hours and stained with MitoTracker. Images were analyzed by time-lapse and epifluorescence microscopy. Frames were taken every 0.5 sec for 1 min.

**Movie S2.** 3T3 cell transfected with YFP-R<sub>2</sub>KR<sub>3</sub> for 15 hours and stained with MitoTracker is shown. Images were analyzed by time-lapse and epifluorescence microscopy. Frames were taken every 0.5 sec for 1 min. Still image of Movie S2 is shown in figure 2b of the main text.

**Movie S2a.** Region of interest of a 3T3 cell shown in Movie S2 (lower panel of figure 2b of the main text) transfected with YFP-R<sub>2</sub>KR<sub>3</sub> for 15 hours and stained with MitoTracker. Images were analyzed by time-lapse and epifluorescence microscopy. Frames were taken every 0.5 sec for 1 min.

**Movie S3.** 3T3 cell mock transfected after 15 hours and stained with MitoTracker is shown. Images were analyzed by time-lapse and epifluorescence microscopy. Frames were taken every 0.5 sec for 1 min. Still image of Movie S3 is shown in figure 2c of the main text.

**Movie S3a.** Region of interest of a 3T3 cell shown in Movie S3 (lower panel of figure 2c of the main text) mock transfected after 15 hours and stained with MitoTracker. Images were analyzed by time-lapse and epifluorescence microscopy. Frames were taken every 0.5 sec for 1 min.



**Supplementary Table 1.** Summary of calculated biophysical parameters of mitochondrial motility illustrating data sample size ( $n$ , number of mitochondria), mode, and five number data summary (minimum, 1st quartile, median, 3rd quartile, maximum) for each data set. Legend: MOCK, mock-transfected; KBD, kinesin-binding domain; \*, W→R mutation; R<sub>2</sub>KR<sub>3</sub>, RBD<sub>2</sub>-KBD-RBD<sub>3</sub>.

| Hours of transfection and construct                                             | $n$ total | Mode    | Minimum | 1st Quartile (Q1) | Median  | 3rd Quartile (Q3) | Maximum |
|---------------------------------------------------------------------------------|-----------|---------|---------|-------------------|---------|-------------------|---------|
| <b>A. AVERAGE VELOCITY (<math>\mu\text{m}/\text{second}</math>)</b>             |           |         |         |                   |         |                   |         |
| 8 hr MOCK                                                                       | 110       | --      | 0.30098 | 0.35045           | 0.38204 | 0.41502           | 0.60456 |
| 8 hr KBD*                                                                       | 99        | 0.37831 | 0.33793 | 0.43091           | 0.46022 | 0.49946           | 1.04127 |
| 8 hr KBD                                                                        | 102       | 0.41999 | 0.32291 | 0.40855           | 0.4536  | 0.50519           | 0.94317 |
| 10 hr MOCK                                                                      | 105       | --      | 0.31255 | 0.38702           | 0.40913 | 0.44976           | 0.59135 |
| 10 hr KBD*                                                                      | 63        | --      | 0.30542 | 0.39619           | 0.44384 | 0.49365           | 0.65958 |
| 10 hr KBD                                                                       | 94        | --      | 0.35554 | 0.41314           | 0.43886 | 0.47728           | 0.67927 |
| 12 hr MOCK                                                                      | 90        | --      | 0.30392 | 0.38908           | 0.43496 | 0.47051           | 0.68305 |
| 12 hr KBD*                                                                      | 100       | --      | 0.32075 | 0.40403           | 0.42173 | 0.46631           | 0.71175 |
| 12 hr KBD                                                                       | 88        | --      | 0.35672 | 0.44238           | 0.50928 | 0.615             | 0.78083 |
| 12 hr R <sub>2</sub> KR <sub>3</sub>                                            | 103       | --      | 0.31064 | 0.42929           | 0.47508 | 0.59369           | 0.98693 |
| 12 hr R* <sub>2</sub> KR* <sub>3</sub>                                          | 111       | --      | 0.30384 | 0.38561           | 0.42034 | 0.48795           | 0.85052 |
| 12 hr R* <sub>2</sub> KR <sub>3</sub>                                           | 95        | 0.4631  | 0.31825 | 0.38148           | 0.41495 | 0.4631            | 0.64094 |
| 12 hr R <sub>2</sub> KR* <sub>3</sub>                                           | 100       | --      | 0.32476 | 0.41228           | 0.48036 | 0.54798           | 0.99421 |
| 15 hr MOCK                                                                      | 95        | 0.47607 | 0.33494 | 0.41261           | 0.44156 | 0.50142           | 0.65283 |
| 15 hr R <sub>2</sub> KR <sub>3</sub>                                            | 81        | 0.38728 | 0.30654 | 0.38728           | 0.41411 | 0.44266           | 0.60108 |
| 15 hr R* <sub>2</sub> KR* <sub>3</sub>                                          | 100       | 0.42224 | 0.3288  | 0.38195           | 0.41015 | 0.43493           | 0.57441 |
| 15 hr R* <sub>2</sub> KR <sub>3</sub>                                           | 80        | 0.39172 | 0.32303 | 0.38693           | 0.43282 | 0.45338           | 0.66466 |
| 15 hr R <sub>2</sub> KR* <sub>3</sub>                                           | 74        | --      | 0.33414 | 0.40229           | 0.42721 | 0.45678           | 0.60394 |
| <b>B. AVERAGE ANTEROGRADE VELOCITY (<math>\mu\text{m}/\text{second}</math>)</b> |           |         |         |                   |         |                   |         |
| 8 hr MOCK                                                                       | 101       | --      | 0.3005  | 0.35766           | 0.39226 | 0.41339           | 0.64272 |
| 8 hr KBD*                                                                       | 94        | 0.33309 | 0.3048  | 0.39412           | 0.44512 | 0.50541           | 0.80555 |
| 8 hr KBD                                                                        | 101       | 0.40479 | 0.3125  | 0.40276           | 0.44765 | 0.50209           | 0.94317 |
| 10 hr MOCK                                                                      | 98        | --      | 0.3006  | 0.38093           | 0.40552 | 0.44703           | 0.65975 |
| 10 hr KBD*                                                                      | 60        | --      | 0.30542 | 0.37882           | 0.44582 | 0.48146           | 0.84154 |
| 10 hr KBD                                                                       | 92        | 0.41402 | 0.34756 | 0.41011           | 0.44259 | 0.47914           | 0.70808 |
| 12 hr MOCK                                                                      | 89        | --      | 0.30392 | 0.37954           | 0.43095 | 0.47757           | 0.94736 |
| 12 hr KBD*                                                                      | 100       | --      | 0.32425 | 0.38995           | 0.42761 | 0.46713           | 0.73983 |
| 12 hr KBD                                                                       | 88        | --      | 0.3305  | 0.43197           | 0.50783 | 0.61227           | 0.8069  |
| 12 hr R <sub>2</sub> KR <sub>3</sub>                                            | 94        | --      | 0.30099 | 0.40493           | 0.47031 | 0.59577           | 1.21396 |
| 12 hr R* <sub>2</sub> KR* <sub>3</sub>                                          | 104       | --      | 0.30008 | 0.38496           | 0.42475 | 0.48087           | 0.63221 |
| 12 hr R* <sub>2</sub> KR <sub>3</sub>                                           | 90        | 0.81351 | 0.30178 | 0.36757           | 0.40052 | 0.46301           | 0.82911 |
| 12 hr R <sub>2</sub> KR* <sub>3</sub>                                           | 95        | --      | 0.30276 | 0.38358           | 0.43279 | 0.53677           | 1.18009 |
| 15 hr MOCK                                                                      | 95        | 0.47357 | 0.32861 | 0.40239           | 0.44181 | 0.50406           | 0.66999 |

|                                        |    |         |         |         |         |         |         |
|----------------------------------------|----|---------|---------|---------|---------|---------|---------|
| 15 hr R <sub>2</sub> KR <sub>3</sub>   | 77 | 0.30916 | 0.30654 | 0.38365 | 0.41616 | 0.44962 | 0.70395 |
| 15 hr R* <sub>2</sub> KR* <sub>3</sub> | 95 | 0.35272 | 0.30673 | 0.37466 | 0.4067  | 0.44702 | 0.61711 |
| 15 hr R* <sub>2</sub> KR <sub>3</sub>  | 77 | 0.38691 | 0.32613 | 0.38407 | 0.42539 | 0.46138 | 0.66466 |
| 15 hr R <sub>2</sub> KR* <sub>3</sub>  | 69 | --      | 0.32614 | 0.39968 | 0.42495 | 0.47835 | 0.64019 |

### C. AVERAGE RETROGRADE VELOCITY (µm/second)

|                                        |     |         |         |         |         |         |         |
|----------------------------------------|-----|---------|---------|---------|---------|---------|---------|
| 8 hr MOCK                              | 104 | --      | 0.30098 | 0.34967 | 0.37774 | 0.41151 | 0.60791 |
| 8 hr KBD*                              | 97  | 0.3977  | 0.31371 | 0.40703 | 0.46291 | 0.50721 | 1.04127 |
| 8 hr KBD                               | 100 | 0.42551 | 0.30158 | 0.41056 | 0.4436  | 0.51054 | 0.90561 |
| 10 hr MOCK                             | 97  | --      | 0.30784 | 0.38056 | 0.41366 | 0.4455  | 0.59135 |
| 10 hr KBD*                             | 57  | --      | 0.31552 | 0.40941 | 0.44335 | 0.48397 | 0.61971 |
| 10 hr KBD                              | 89  | --      | 0.32432 | 0.41631 | 0.43724 | 0.4843  | 0.65692 |
| 12 hr MOCK                             | 85  | --      | 0.30467 | 0.39132 | 0.44243 | 0.48217 | 0.59101 |
| 12 hr KBD*                             | 97  | --      | 0.31149 | 0.39793 | 0.43217 | 0.47286 | 0.73961 |
| 12 hr KBD                              | 88  | --      | 0.33748 | 0.45435 | 0.52128 | 0.61599 | 0.85101 |
| 12 hr R <sub>2</sub> KR <sub>3</sub>   | 97  | --      | 0.31064 | 0.40441 | 0.46154 | 0.58637 | 1.65926 |
| 12 hr R* <sub>2</sub> KR* <sub>3</sub> | 102 | --      | 0.30667 | 0.36477 | 0.39817 | 0.47551 | 0.99201 |
| 12 hr R* <sub>2</sub> KR <sub>3</sub>  | 91  | 0.30054 | 0.30054 | 0.37669 | 0.40388 | 0.455   | 0.86872 |
| 12 hr R <sub>2</sub> KR* <sub>3</sub>  | 92  | --      | 0.30777 | 0.39439 | 0.48402 | 0.58648 | 1.22352 |
| 15 hr MOCK                             | 95  | 0.47819 | 0.30568 | 0.40991 | 0.44774 | 0.50869 | 0.69459 |
| 15 hr R <sub>2</sub> KR <sub>3</sub>   | 72  | 0.41852 | 0.31464 | 0.37894 | 0.40223 | 0.45256 | 0.66022 |
| 15 hr R* <sub>2</sub> KR* <sub>3</sub> | 98  | 0.45342 | 0.30039 | 0.37667 | 0.41389 | 0.44617 | 0.57101 |
| 15 hr R* <sub>2</sub> KR <sub>3</sub>  | 76  | 0.37877 | 0.31207 | 0.37946 | 0.42311 | 0.47243 | 0.64488 |
| 15 hr R <sub>2</sub> KR* <sub>3</sub>  | 71  | --      | 0.31642 | 0.36967 | 0.42057 | 0.44289 | 0.55928 |

### D. TOTAL DISPLACEMENT (µm/minute)

|                                        |     |         |         |         |         |          |          |
|----------------------------------------|-----|---------|---------|---------|---------|----------|----------|
| 8 hr MOCK                              | 110 | --      | 0.07524 | 0.5653  | 1.11619 | 2.30556  | 12.40762 |
| 8 hr KBD*                              | 99  | 0.95751 | 0.1868  | 1.05133 | 1.75083 | 2.68391  | 9.20704  |
| 8 hr KBD                               | 102 | 1.57331 | 0.08042 | 1.62949 | 2.96463 | 4.5701   | 10.41825 |
| 10 hr MOCK                             | 105 | --      | 0.08569 | 0.59819 | 1.48524 | 3.28255  | 8.22977  |
| 10 hr KBD*                             | 63  | --      | 0.09447 | 0.67022 | 1.79086 | 4.0749   | 9.18009  |
| 10 hr KBD                              | 94  | --      | 0.08889 | 2.2524  | 4.28929 | 5.59389  | 14.78431 |
| 12 hr MOCK                             | 90  | --      | 0.07583 | 1.06404 | 1.90675 | 3.49333  | 12.40051 |
| 12 hr KBD*                             | 100 | --      | 0.23501 | 1.27599 | 2.22036 | 3.77591  | 15.99208 |
| 12 hr KBD                              | 88  | --      | 0.26992 | 4.37104 | 8.18931 | 10.57407 | 17.32344 |
| 12 hr R <sub>2</sub> KR <sub>3</sub>   | 103 | --      | 0.08563 | 0.65646 | 0.97331 | 1.55557  | 4.58827  |
| 12 hr R* <sub>2</sub> KR* <sub>3</sub> | 111 | --      | 0.07991 | 0.55426 | 0.9365  | 1.68944  | 7.85724  |
| 12 hr R* <sub>2</sub> KR <sub>3</sub>  | 95  | 0.57007 | 0.08275 | 0.56833 | 1.12408 | 1.96666  | 8.34378  |
| 12 hr R <sub>2</sub> KR* <sub>3</sub>  | 100 | --      | 0.16024 | 0.54333 | 1.27414 | 2.25106  | 5.17794  |
| 15 hr MOCK                             | 95  | 7.27676 | 0.25518 | 2.83236 | 4.1434  | 7.30006  | 15.63323 |
| 15 hr R <sub>2</sub> KR <sub>3</sub>   | 81  | 0.70464 | 0.07893 | 0.64088 | 1.53149 | 3.15825  | 9.35999  |

|                                        |     |         |         |         |         |         |          |
|----------------------------------------|-----|---------|---------|---------|---------|---------|----------|
| 15 hr R <sub>2</sub> KR <sub>3</sub> * | 100 | 1.86694 | 0.09838 | 0.95007 | 2.26198 | 3.22558 | 11.49638 |
| 15 hr R <sub>2</sub> KR <sub>3</sub>   | 80  | 1.51445 | 0.08415 | 1.18722 | 2.06891 | 4.22255 | 14.90669 |
| 15 hr R <sub>2</sub> KR <sub>3</sub> * | 74  | --      | 0.10592 | 0.60685 | 1.38297 | 2.63177 | 7.42819  |

**E. TOTAL ANTEROGRADE DISPLACEMENT (µm/minute)**

|                                        |     |         |         |         |         |         |         |
|----------------------------------------|-----|---------|---------|---------|---------|---------|---------|
| 8 hr MOCK                              | 101 | --      | 0.07512 | 0.2857  | 0.53184 | 1.34224 | 6.17187 |
| 8 hr KBD*                              | 94  | 0.25276 | 0.07838 | 0.42837 | 0.72632 | 1.15722 | 3.59736 |
| 8 hr KBD                               | 101 | 0.40464 | 0.07812 | 0.7805  | 1.53118 | 2.3539  | 5.70283 |
| 10 hr MOCK                             | 98  | --      | 0.075   | 0.28498 | 0.87158 | 1.77579 | 4.8536  |
| 10 hr KBD*                             | 60  | --      | 0.08525 | 0.31096 | 0.9655  | 2.13483 | 5.28789 |
| 10 hr KBD                              | 92  | 2.38427 | 0.08672 | 1.05075 | 1.95443 | 2.84807 | 6.73434 |
| 12 hr MOCK                             | 89  | --      | 0.07583 | 0.4748  | 1.01899 | 1.65811 | 6.6961  |
| 12 hr KBD*                             | 100 | --      | 0.08351 | 0.51316 | 1.08408 | 1.92832 | 8.34959 |
| 12 hr KBD                              | 88  | --      | 0.08326 | 2.07966 | 3.74258 | 5.33465 | 9.72095 |
| 12 hr R <sub>2</sub> KR <sub>3</sub>   | 94  | --      | 0.07254 | 0.22982 | 0.47947 | 0.80985 | 2.22357 |
| 12 hr R <sub>2</sub> KR <sub>3</sub> * | 104 | --      | 0.07991 | 0.22465 | 0.58618 | 0.93964 | 4.21307 |
| 12 hr R <sub>2</sub> KR <sub>3</sub>   | 90  | 0.19484 | 0.07545 | 0.21363 | 0.48276 | 0.86224 | 3.86596 |
| 12 hr R <sub>2</sub> KR <sub>3</sub> * | 95  | --      | 0.07569 | 0.31428 | 0.61284 | 1.11451 | 2.94905 |
| 15 hr MOCK                             | 95  | 3.3274  | 0.17877 | 1.23419 | 2.29923 | 3.3274  | 9.45156 |
| 15 hr R <sub>2</sub> KR <sub>3</sub>   | 77  | 0.16061 | 0.07893 | 0.36468 | 0.79201 | 1.58021 | 6.35033 |
| 15 hr R <sub>2</sub> KR <sub>3</sub> * | 95  | 0.27065 | 0.07975 | 0.37653 | 1.27131 | 2.12556 | 5.06549 |
| 15 hr R <sub>2</sub> KR <sub>3</sub>   | 77  | 0.29724 | 0.10504 | 0.49598 | 1.11587 | 2.2281  | 8.44761 |
| 15 hr R <sub>2</sub> KR <sub>3</sub> * | 69  | --      | 0.08579 | 0.35124 | 0.97217 | 1.36476 | 4.00133 |

**F. TOTAL RETROGRADE DISPLACEMENT (µm/minute)**

|                                        |     |         |         |         |         |         |         |
|----------------------------------------|-----|---------|---------|---------|---------|---------|---------|
| 8 hr MOCK                              | 104 | --      | 0.07524 | 0.33802 | 0.58905 | 1.25362 | 6.23575 |
| 8 hr KBD*                              | 97  | 0.70475 | 0.07843 | 0.51483 | 0.97509 | 1.60556 | 5.60968 |
| 8 hr KBD                               | 100 | 1.16867 | 0.07539 | 0.81242 | 1.48723 | 2.1394  | 5.39631 |
| 10 hr MOCK                             | 97  | --      | 0.08173 | 0.41054 | 0.85599 | 1.9533  | 5.11233 |
| 10 hr KBD*                             | 57  | --      | 0.07888 | 0.43034 | 1.09488 | 2.08466 | 5.22529 |
| 10 hr KBD                              | 89  | --      | 0.20833 | 1.41352 | 2.36206 | 2.89618 | 8.04997 |
| 12 hr MOCK                             | 85  | --      | 0.07921 | 0.52563 | 1.02296 | 1.86372 | 5.70441 |
| 12 hr KBD*                             | 97  | --      | 0.0944  | 0.71309 | 1.31719 | 2.18355 | 8.97313 |
| 12 hr KBD                              | 88  | --      | 0.17112 | 2.09946 | 4.08435 | 5.50113 | 9.14756 |
| 12 hr R <sub>2</sub> KR <sub>3</sub>   | 97  | --      | 0.0786  | 0.33916 | 0.59177 | 0.94594 | 2.52474 |
| 12 hr R <sub>2</sub> KR <sub>3</sub> * | 102 | --      | 0.07698 | 0.20522 | 0.4674  | 0.87109 | 3.64417 |
| 12 hr R <sub>2</sub> KR <sub>3</sub>   | 91  | 0.07498 | 0.07498 | 0.26123 | 0.65219 | 1.05509 | 4.47782 |
| 12 hr R <sub>2</sub> KR <sub>3</sub> * | 92  | --      | 0.07694 | 0.3453  | 0.71092 | 1.1157  | 2.85864 |
| 15 hr MOCK                             | 95  | 3.94936 | 0.07642 | 1.37252 | 2.09014 | 3.83167 | 7.87046 |
| 15 hr R <sub>2</sub> KR <sub>3</sub>   | 72  | 0.54403 | 0.07866 | 0.35193 | 0.83531 | 1.83709 | 3.61473 |
| 15 hr R <sub>2</sub> KR <sub>3</sub> * | 98  | 2.11404 | 0.0778  | 0.48613 | 0.99045 | 1.84052 | 6.78031 |

|                                        |    |         |         |         |         |         |         |
|----------------------------------------|----|---------|---------|---------|---------|---------|---------|
| 15 hr R <sub>2</sub> KR <sub>3</sub>   | 76 | 0.67693 | 0.08415 | 0.66395 | 1.15628 | 2.17111 | 6.87211 |
| 15 hr R <sub>2</sub> KR <sub>3</sub> * | 71 | --      | 0.08496 | 0.28433 | 0.64554 | 1.22291 | 3.42686 |

### G. FREQUENCY OF DIRECTION CHANGE (minute<sup>-1</sup>)

|                                        |     |    |   |    |     |      |    |
|----------------------------------------|-----|----|---|----|-----|------|----|
| 8 hr MOCK                              | 101 | 1  | 1 | 3  | 6   | 15   | 44 |
| 8 hr KBD*                              | 94  | 4  | 1 | 4  | 6   | 10   | 37 |
| 8 hr KBD                               | 100 | 5  | 1 | 7  | 16  | 24   | 52 |
| 10 hr MOCK                             | 95  | 2  | 1 | 3  | 9   | 21   | 39 |
| 10 hr KBD*                             | 60  | 1  | 1 | 3  | 6.5 | 20   | 39 |
| 10 hr KBD                              | 91  | 1  | 1 | 12 | 22  | 28   | 51 |
| 12 hr MOCK                             | 86  | 1  | 1 | 5  | 9   | 16   | 47 |
| 12 hr KBD*                             | 99  | 2  | 1 | 5  | 11  | 22   | 49 |
| 12 hr KBD                              | 88  | 41 | 2 | 21 | 34  | 40.5 | 60 |
| 12 hr R <sub>2</sub> KR <sub>3</sub>   | 93  | 1  | 1 | 1  | 3   | 6    | 30 |
| 12 hr R <sub>2</sub> KR <sub>3</sub> * | 104 | 1  | 1 | 2  | 3   | 6    | 44 |
| 12 hr R <sub>2</sub> KR <sub>3</sub>   | 89  | 2  | 1 | 3  | 6   | 9    | 29 |
| 12 hr R <sub>2</sub> KR <sub>3</sub> * | 90  | 7  | 1 | 3  | 6   | 8    | 20 |
| 15 hr MOCK                             | 95  | 18 | 2 | 14 | 23  | 32   | 60 |
| 15 hr R <sub>2</sub> KR <sub>3</sub>   | 77  | 1  | 1 | 3  | 6   | 14   | 34 |
| 15 hr R <sub>2</sub> KR <sub>3</sub> * | 99  | 2  | 1 | 4  | 9   | 15   | 43 |
| 15 hr R <sub>2</sub> KR <sub>3</sub>   | 77  | 7  | 1 | 6  | 10  | 20   | 49 |
| 15 hr R <sub>2</sub> KR <sub>3</sub> * | 70  | 2  | 1 | 2  | 6   | 10   | 34 |

### H. FREQUENCY OF STATIONARY MITOCHONDRIA (minute<sup>-1</sup>)

|                                        |     |     |    |       |     |       |     |
|----------------------------------------|-----|-----|----|-------|-----|-------|-----|
| 8 hr MOCK                              | 113 | 112 | 38 | 97    | 109 | 114   | 120 |
| 8 hr KBD*                              | 99  | 103 | 52 | 96    | 105 | 111   | 119 |
| 8 hr KBD                               | 103 | 86  | 38 | 83    | 93  | 106   | 120 |
| 10 hr MOCK                             | 105 | 118 | 52 | 88    | 105 | 114   | 119 |
| 10 hr KBD*                             | 63  | 113 | 50 | 84    | 104 | 113   | 119 |
| 10 hr KBD                              | 94  | 85  | 33 | 71    | 80  | 98    | 119 |
| 12 hr MOCK                             | 95  | 102 | 37 | 89    | 102 | 112   | 120 |
| 12 hr KBD*                             | 100 | 106 | 27 | 84    | 99  | 108.5 | 118 |
| 12 hr KBD                              | 88  | 49  | 18 | 49    | 60  | 81    | 117 |
| 12 hr R <sub>2</sub> KR <sub>3</sub>   | 104 | 117 | 80 | 105.5 | 112 | 116   | 120 |
| 12 hr R <sub>2</sub> KR <sub>3</sub> * | 114 | 113 | 65 | 106   | 112 | 116   | 120 |
| 12 hr R <sub>2</sub> KR <sub>3</sub>   | 96  | 117 | 56 | 101   | 109 | 115   | 120 |
| 12 hr R <sub>2</sub> KR <sub>3</sub> * | 100 | 115 | 79 | 103   | 109 | 115   | 119 |
| 15 hr MOCK                             | 96  | 59  | 24 | 63.5  | 81  | 94    | 120 |
| 15 hr R <sub>2</sub> KR <sub>3</sub>   | 82  | 108 | 54 | 90    | 106 | 114   | 120 |
| 15 hr R <sub>2</sub> KR <sub>3</sub> * | 100 | 95  | 34 | 90    | 99  | 111   | 119 |
| 15 hr R <sub>2</sub> KR <sub>3</sub>   | 87  | 120 | 28 | 85    | 102 | 113   | 120 |

|                                                                                |     |     |    |      |      |      |     |
|--------------------------------------------------------------------------------|-----|-----|----|------|------|------|-----|
| 15 hr R <sub>2</sub> KR <sub>3</sub> <sup>*</sup>                              | 75  | 116 | 60 | 96   | 108  | 115  | 120 |
| <b>I. FREQUENCY OF ANTEROGRADE MITOCHONDRIA MOTILITY (minute<sup>-1</sup>)</b> |     |     |    |      |      |      |     |
| 8 hr MOCK                                                                      | 101 | 1   | 1  | 3    | 6    | 13   | 41  |
| 8 hr KBD <sup>*</sup>                                                          | 94  | 4   | 1  | 4    | 6.5  | 11   | 29  |
| 8 hr KBD                                                                       | 101 | 19  | 1  | 7    | 14   | 19   | 43  |
| 10 hr MOCK                                                                     | 98  | 1   | 1  | 3    | 8.5  | 17   | 40  |
| 10 hr KBD <sup>*</sup>                                                         | 60  | 3   | 1  | 3    | 9    | 18.5 | 40  |
| 10 hr KBD                                                                      | 92  | 11  | 1  | 11   | 17   | 24.5 | 39  |
| 12 hr MOCK                                                                     | 89  | 5   | 1  | 5    | 9    | 15   | 44  |
| 12 hr KBD <sup>*</sup>                                                         | 100 | 4   | 1  | 5    | 10   | 17   | 45  |
| 12 hr KBD                                                                      | 88  | 32  | 1  | 18.5 | 29   | 35   | 53  |
| 12 hr R <sub>2</sub> KR <sub>3</sub>                                           | 94  | 2   | 1  | 2    | 4    | 7    | 20  |
| 12 hr R <sub>2</sub> KR <sub>3</sub> <sup>*</sup>                              | 104 | 1   | 1  | 2    | 5    | 8    | 28  |
| 12 hr R <sub>2</sub> KR <sub>3</sub> <sup>*</sup>                              | 90  | 2   | 1  | 2    | 5    | 9    | 28  |
| 12 hr R <sub>2</sub> KR <sub>3</sub> <sup>*</sup>                              | 95  | 2   | 1  | 3    | 5    | 9    | 22  |
| 15 hr MOCK                                                                     | 95  | 17  | 2  | 13   | 21   | 28   | 59  |
| 15 hr R <sub>2</sub> KR <sub>3</sub>                                           | 77  | 4   | 1  | 4    | 7    | 14   | 45  |
| 15 hr R <sub>2</sub> KR <sub>3</sub> <sup>*</sup>                              | 95  | 2   | 1  | 4    | 12   | 19   | 37  |
| 15 hr R <sub>2</sub> KR <sub>3</sub> <sup>*</sup>                              | 77  | 3   | 1  | 4    | 10   | 19   | 51  |
| 15 hr R <sub>2</sub> KR <sub>3</sub> <sup>*</sup>                              | 69  | 1   | 1  | 3    | 9    | 12   | 32  |
| <b>J. FREQUENCY OF RETROGRADE MITOCHONDRIA MOTILITY (minute<sup>-1</sup>)</b>  |     |     |    |      |      |      |     |
| 8 hr MOCK                                                                      | 104 | 5   | 1  | 3.5  | 6    | 13   | 41  |
| 8 hr KBD <sup>*</sup>                                                          | 97  | 3   | 1  | 5    | 8    | 14   | 40  |
| 8 hr KBD                                                                       | 100 | 3   | 1  | 7    | 13   | 18.5 | 43  |
| 10 hr MOCK                                                                     | 97  | 1   | 1  | 4    | 8    | 17   | 37  |
| 10 hr KBD <sup>*</sup>                                                         | 57  | 3   | 1  | 4    | 10   | 19   | 38  |
| 10 hr KBD                                                                      | 89  | 22  | 2  | 13   | 22   | 26   | 49  |
| 12 hr MOCK                                                                     | 85  | 9   | 1  | 5    | 9    | 17   | 39  |
| 12 hr KBD <sup>*</sup>                                                         | 97  | 8   | 1  | 7    | 12   | 20   | 49  |
| 12 hr KBD                                                                      | 88  | 31  | 2  | 19   | 30.5 | 37   | 53  |
| 12 hr R <sub>2</sub> KR <sub>3</sub>                                           | 97  | 2   | 1  | 2    | 5    | 8    | 20  |
| 12 hr R <sub>2</sub> KR <sub>3</sub> <sup>*</sup>                              | 102 | 2   | 1  | 2    | 4    | 8    | 27  |
| 12 hr R <sub>2</sub> KR <sub>3</sub> <sup>*</sup>                              | 91  | 2   | 1  | 3    | 6    | 10   | 36  |
| 12 hr R <sub>2</sub> KR <sub>3</sub> <sup>*</sup>                              | 92  | 3   | 1  | 3    | 5.5  | 9    | 23  |
| 15 hr MOCK                                                                     | 95  | 18  | 1  | 12   | 19   | 29   | 48  |
| 15 hr R <sub>2</sub> KR <sub>3</sub>                                           | 72  | 3   | 1  | 3.5  | 8    | 16.5 | 31  |
| 15 hr R <sub>2</sub> KR <sub>3</sub> <sup>*</sup>                              | 98  | 2   | 1  | 4    | 10   | 16   | 49  |
| 15 hr R <sub>2</sub> KR <sub>3</sub> <sup>*</sup>                              | 76  | 7   | 1  | 6    | 11.5 | 19   | 41  |
| 15 hr R <sub>2</sub> KR <sub>3</sub> <sup>*</sup>                              | 71  | 6   | 1  | 3    | 6    | 11   | 28  |

| <b>K. PERSISTENCY OF MITOCHONDRIA MOTILITY (Seconds)</b>            |     |     |   |     |      |      |      |
|---------------------------------------------------------------------|-----|-----|---|-----|------|------|------|
| 8 hr MOCK                                                           | 106 | 1   | 1 | 1   | 1.5  | 2.5  | 5.5  |
| 8 hr KBD*                                                           | 97  | 2   | 1 | 1.5 | 2    | 3    | 4.5  |
| 8 hr KBD                                                            | 101 | 2.5 | 1 | 2   | 2.5  | 3.5  | 11.5 |
| 10 hr MOCK                                                          | 100 | 1.5 | 1 | 1.5 | 2    | 3    | 7.5  |
| 10 hr KBD*                                                          | 62  | 1.5 | 1 | 1.5 | 2    | 3    | 6.5  |
| 10 hr KBD                                                           | 93  | 2.5 | 1 | 2   | 2.5  | 3.5  | 9.5  |
| 12 hr MOCK                                                          | 88  | 1.5 | 1 | 1.5 | 2    | 3    | 6.5  |
| 12 hr KBD*                                                          | 100 | 1.5 | 1 | 1.5 | 2    | 3    | 7.5  |
| 12 hr KBD                                                           | 88  | 3.5 | 1 | 3   | 3.5  | 4.5  | 14.5 |
| 12 hr R <sub>2</sub> KR <sub>3</sub>                                | 101 | 1   | 1 | 1   | 1.5  | 2    | 4    |
| 12 hr R* <sub>2</sub> KR* <sub>3</sub>                              | 110 | 1   | 1 | 1   | 1.5  | 2    | 6.5  |
| 12 hr R* <sub>2</sub> KR <sub>3</sub>                               | 94  | 1.5 | 1 | 1   | 1.5  | 2    | 5.5  |
| 12 hr R <sub>2</sub> KR* <sub>3</sub>                               | 97  | 1.5 | 1 | 1   | 1.5  | 2.5  | 4.5  |
| 15 hr MOCK                                                          | 95  | 2   | 1 | 2   | 3    | 4    | 12.5 |
| 15 hr R <sub>2</sub> KR <sub>3</sub>                                | 80  | 1.5 | 1 | 1.5 | 2    | 2.5  | 9    |
| 15 hr R* <sub>2</sub> KR* <sub>3</sub>                              | 99  | 2   | 1 | 1.5 | 2    | 2.5  | 8.5  |
| 15 hr R* <sub>2</sub> KR <sub>3</sub>                               | 77  | 1.5 | 1 | 1.5 | 2    | 3    | 10.5 |
| 15 hr R <sub>2</sub> KR* <sub>3</sub>                               | 72  | 1.5 | 1 | 1.5 | 1.5  | 2.5  | 5    |
| <b>L. PERSISTENCY OF RETROGRADE MITOCHONDRIA MOTILITY (Seconds)</b> |     |     |   |     |      |      |      |
| 8 hr MOCK                                                           | 48  | 1   | 1 | 1   | 1    | 1    | 2.5  |
| 8 hr KBD*                                                           | 50  | 1   | 1 | 1   | 1.25 | 1.5  | 2.5  |
| 8 hr KBD                                                            | 61  | 1   | 1 | 1   | 1    | 1.5  | 3    |
| 10 hr MOCK                                                          | 54  | 1   | 1 | 1   | 1    | 1.5  | 3    |
| 10 hr KBD*                                                          | 39  | 1   | 1 | 1   | 1    | 1.5  | 3    |
| 10 hr KBD                                                           | 73  | 1   | 1 | 1   | 1    | 1.5  | 3    |
| 12 hr MOCK                                                          | 53  | 1   | 1 | 1   | 1    | 1.5  | 3.5  |
| 12 hr KBD*                                                          | 66  | 1   | 1 | 1   | 1    | 1.5  | 2.5  |
| 12 hr KBD                                                           | 81  | 1   | 1 | 1   | 1.5  | 2    | 4    |
| 12 hr R <sub>2</sub> KR <sub>3</sub>                                | 40  | 1   | 1 | 1   | 1    | 1.5  | 2    |
| 12 hr R* <sub>2</sub> KR* <sub>3</sub>                              | 38  | 1   | 1 | 1   | 1    | 1    | 3.5  |
| 12 hr R* <sub>2</sub> KR <sub>3</sub>                               | 43  | 1   | 1 | 1   | 1    | 1.5  | 4    |
| 12 hr R <sub>2</sub> KR* <sub>3</sub>                               | 44  | 1   | 1 | 1   | 1    | 1.75 | 4    |
| 15 hr MOCK                                                          | 78  | 1   | 1 | 1   | 1.5  | 1.5  | 2.5  |
| 15 hr R <sub>2</sub> KR <sub>3</sub>                                | 47  | 1   | 1 | 1   | 1    | 1.5  | 3.5  |
| 15 hr R* <sub>2</sub> KR* <sub>3</sub>                              | 57  | 1   | 1 | 1   | 1    | 1.5  | 3    |
| 15 hr R* <sub>2</sub> KR <sub>3</sub>                               | 50  | 1   | 1 | 1   | 1    | 1.5  | 4.5  |
| 15 hr R <sub>2</sub> KR* <sub>3</sub>                               | 40  | 1   | 1 | 1   | 1    | 1.5  | 3    |

**M. PERSISTENCY OF AMOCKEROGRADE MITOCHONDRIA MOTILITY (Seconds)**

|                                        |    |     |   |   |     |     |     |
|----------------------------------------|----|-----|---|---|-----|-----|-----|
| 8 hr MOCK                              | 45 | 1   | 1 | 1 | 1   | 1.5 | 3   |
| 8 hr KBD*                              | 49 | 1   | 1 | 1 | 1   | 1.5 | 2.5 |
| 8 hr KBD                               | 64 | 1   | 1 | 1 | 1   | 1.5 | 3   |
| 10 hr MOCK                             | 54 | 1   | 1 | 1 | 1   | 1.5 | 3   |
| 10 hr KBD*                             | 33 | 1   | 1 | 1 | 1   | 1.5 | 2.5 |
| 10 hr KBD                              | 73 | 1   | 1 | 1 | 1   | 1.5 | 2.5 |
| 12 hr MOCK                             | 50 | 1   | 1 | 1 | 1   | 1.5 | 3   |
| 12 hr KBD*                             | 56 | 1   | 1 | 1 | 1   | 1   | 2.5 |
| 12 hr KBD                              | 73 | 1.5 | 1 | 1 | 1.5 | 2   | 3   |
| 12 hr R <sub>2</sub> KR <sub>3</sub>   | 23 | 1   | 1 | 1 | 1   | 1.5 | 2   |
| 12 hr R* <sub>2</sub> KR* <sub>3</sub> | 45 | 1   | 1 | 1 | 1   | 1.5 | 5.5 |
| 12 hr R* <sub>2</sub> KR <sub>3</sub>  | 27 | 1   | 1 | 1 | 1   | 1.5 | 5   |
| 12 hr R <sub>2</sub> KR* <sub>3</sub>  | 39 | 1   | 1 | 1 | 1   | 1.5 | 3.5 |
| 15 hr MOCK                             | 79 | 1   | 1 | 1 | 1   | 1.5 | 3   |
| 15 hr R <sub>2</sub> KR <sub>3</sub>   | 47 | 1   | 1 | 1 | 1.5 | 1.5 | 5.5 |
| 15 hr R* <sub>2</sub> KR* <sub>3</sub> | 60 | 1   | 1 | 1 | 1.5 | 2   | 5   |
| 15 hr R* <sub>2</sub> KR <sub>3</sub>  | 51 | 1   | 1 | 1 | 1   | 2   | 3   |
| 15 hr R <sub>2</sub> KR* <sub>3</sub>  | 39 | 1   | 1 | 1 | 1   | 1.5 | 4.5 |

**N. MAXIMUM DURATION OF PAUSE (Seconds)**

|                                        |     |      |     |       |       |       |      |
|----------------------------------------|-----|------|-----|-------|-------|-------|------|
| 8 hr MOCK                              | 113 | 11.5 | 1.5 | 9     | 18.5  | 29.5  | 60   |
| 8 hr KBD*                              | 99  | 9.5  | 2.5 | 12    | 17    | 27    | 59.5 |
| 8 hr KBD                               | 103 | 3.5  | 2   | 6.5   | 12    | 25    | 60   |
| 10 hr MOCK                             | 105 | 5.5  | 2.5 | 7.5   | 16.5  | 31    | 59.5 |
| 10 hr KBD*                             | 63  | 5.5  | 2.5 | 7     | 15.5  | 30    | 59.5 |
| 10 hr KBD                              | 94  | 4.5  | 2   | 4.5   | 6.5   | 11.5  | 59.5 |
| 12 hr MOCK                             | 95  | 10   | 1.5 | 8.5   | 13.5  | 28.5  | 60   |
| 12 hr KBD*                             | 100 | 8    | 1.5 | 8     | 13.75 | 21    | 40   |
| 12 hr KBD                              | 88  | 2.5  | 1   | 2.5   | 3.5   | 8.5   | 43   |
| 12 hr R <sub>2</sub> KR <sub>3</sub>   | 104 | 23   | 5   | 17.25 | 25    | 36.5  | 60   |
| 12 hr R* <sub>2</sub> KR* <sub>3</sub> | 114 | 15.5 | 5   | 16    | 23.75 | 34.5  | 60   |
| 12 hr R* <sub>2</sub> KR <sub>3</sub>  | 96  | 11   | 2.5 | 12.5  | 19    | 28.75 | 60   |
| 12 hr R <sub>2</sub> KR* <sub>3</sub>  | 100 | 19   | 5.5 | 14.5  | 21.25 | 33    | 59.5 |
| 15 hr MOCK                             | 96  | 4    | 1   | 4     | 6.5   | 10.25 | 60   |
| 15 hr R <sub>2</sub> KR <sub>3</sub>   | 82  | 6    | 3   | 11    | 17    | 27    | 60   |
| 15 hr R* <sub>2</sub> KR* <sub>3</sub> | 100 | 10.5 | 2   | 8     | 12    | 19    | 59   |
| 15 hr R* <sub>2</sub> KR <sub>3</sub>  | 87  | 60   | 1.5 | 7     | 13    | 27    | 60   |
| 15 hr R <sub>2</sub> KR* <sub>3</sub>  | 75  | 13.5 | 4.5 | 11.5  | 17.5  | 32    | 60   |

**O. % MOTILE MITOCHONDRIA**

|                                        |     |          |         |          |          |          |          |
|----------------------------------------|-----|----------|---------|----------|----------|----------|----------|
| 8 hr MOCK                              | 113 | 0.82645  | 0       | 4.95868  | 9.09091  | 19.00826 | 67.7686  |
| 8 hr KBD*                              | 99  | 7.43802  | 0.82645 | 7.43802  | 12.39669 | 19.83471 | 56.19835 |
| 8 hr KBD                               | 103 | 4.13223  | 0       | 11.57025 | 22.31405 | 30.57851 | 67.7686  |
| 10 hr MOCK                             | 105 | 1.65289  | 0.82645 | 4.95868  | 12.39669 | 26.44628 | 56.19835 |
| 10 hr KBD*                             | 63  | 5.78512  | 0.82645 | 5.78512  | 13.22314 | 29.75207 | 57.85124 |
| 10 hr KBD                              | 94  | 28.92562 | 0.82645 | 18.18182 | 33.05785 | 40.49587 | 71.90083 |
| 12 hr MOCK                             | 95  | 14.87603 | 0       | 6.61157  | 14.87603 | 25.61983 | 68.59504 |
| 12 hr KBD*                             | 100 | 11.57025 | 1.65289 | 9.50413  | 17.35537 | 29.75207 | 76.8595  |
| 12 hr KBD                              | 88  | 58.67769 | 2.47934 | 32.2314  | 49.58678 | 58.67769 | 84.29752 |
| 12 hr R <sub>2</sub> KR <sub>3</sub>   | 104 | 2.47934  | 0       | 3.30579  | 6.61157  | 11.98347 | 33.05785 |
| 12 hr R* <sub>2</sub> KR* <sub>3</sub> | 114 | 1.65289  | 0       | 3.30579  | 6.61157  | 11.57025 | 45.45455 |
| 12 hr R* <sub>2</sub> KR <sub>3</sub>  | 96  | 2.47934  | 0       | 4.13223  | 9.09091  | 15.70248 | 52.89256 |
| 12 hr R <sub>2</sub> KR* <sub>3</sub>  | 100 | 4.13223  | 0.82645 | 4.13223  | 9.09091  | 14.04959 | 33.8843  |
| 15 hr MOCK                             | 96  | 22.31405 | 0       | 21.4876  | 32.2314  | 46.69421 | 79.33884 |
| 15 hr R <sub>2</sub> KR <sub>3</sub>   | 82  | 4.13223  | 0       | 4.95868  | 11.57025 | 24.79339 | 54.54545 |
| 15 hr R* <sub>2</sub> KR* <sub>3</sub> | 100 | 2.47934  | 0.82645 | 7.43802  | 17.35537 | 24.79339 | 71.07438 |
| 15 hr R* <sub>2</sub> KR <sub>3</sub>  | 87  | 0        | 0       | 5.78512  | 14.87603 | 28.92562 | 76.03306 |
| 15 hr R <sub>2</sub> KR* <sub>3</sub>  | 75  | 3.30579  | 0       | 4.13223  | 9.91736  | 19.83471 | 49.58678 |

**P. % STATIONARY MITOCHONDRIA**

|                                        |     |          |          |          |          |          |          |
|----------------------------------------|-----|----------|----------|----------|----------|----------|----------|
| 8 hr MOCK                              | 113 | 92.56198 | 31.40496 | 80.16529 | 90.08264 | 94.21488 | 99.17355 |
| 8 hr KBD*                              | 99  | 85.12397 | 42.97521 | 79.33884 | 86.77686 | 91.73554 | 98.34711 |
| 8 hr KBD                               | 103 | 71.07438 | 31.40496 | 68.59504 | 76.8595  | 87.60331 | 99.17355 |
| 10 hr MOCK                             | 105 | 97.52066 | 42.97521 | 72.72727 | 86.77686 | 94.21488 | 98.34711 |
| 10 hr KBD*                             | 63  | 93.38843 | 41.32231 | 69.42149 | 85.95041 | 93.38843 | 98.34711 |
| 10 hr KBD                              | 94  | 70.24793 | 27.27273 | 58.67769 | 66.1157  | 80.99174 | 98.34711 |
| 12 hr MOCK                             | 95  | 84.29752 | 30.57851 | 73.55372 | 84.29752 | 92.56198 | 99.17355 |
| 12 hr KBD*                             | 100 | 87.60331 | 22.31405 | 69.42149 | 81.81818 | 89.66942 | 97.52066 |
| 12 hr KBD                              | 88  | 40.49587 | 14.87603 | 40.49587 | 49.58678 | 66.94215 | 96.69421 |
| 12 hr R <sub>2</sub> KR <sub>3</sub>   | 104 | 96.69421 | 66.1157  | 87.19008 | 92.56198 | 95.86777 | 99.17355 |
| 12 hr R* <sub>2</sub> KR* <sub>3</sub> | 114 | 93.38843 | 53.71901 | 87.60331 | 92.56198 | 95.86777 | 99.17355 |
| 12 hr R* <sub>2</sub> KR <sub>3</sub>  | 96  | 96.69421 | 46.28099 | 83.47107 | 90.08264 | 95.04132 | 99.17355 |
| 12 hr R <sub>2</sub> KR* <sub>3</sub>  | 100 | 95.04132 | 65.28926 | 85.12397 | 90.08264 | 95.04132 | 98.34711 |
| 15 hr MOCK                             | 96  | 48.76033 | 19.83471 | 52.47934 | 66.94215 | 77.68595 | 99.17355 |
| 15 hr R <sub>2</sub> KR <sub>3</sub>   | 82  | 89.2562  | 44.6281  | 74.38017 | 87.60331 | 94.21488 | 99.17355 |
| 15 hr R* <sub>2</sub> KR* <sub>3</sub> | 100 | 78.5124  | 28.09917 | 74.38017 | 81.81818 | 91.73554 | 98.34711 |
| 15 hr R* <sub>2</sub> KR <sub>3</sub>  | 87  | 99.17355 | 23.1405  | 70.24793 | 84.29752 | 93.38843 | 99.17355 |
| 15 hr R <sub>2</sub> KR* <sub>3</sub>  | 75  | 95.86777 | 49.58678 | 79.33884 | 89.2562  | 95.04132 | 99.17355 |



**Supplementary Table 2.** Summary of calculated biophysical parameters of mitochondrial motility illustrating data sample size ( $n$ , number of events), mode, and five number data summary (minimum, 1st quartile, median, 3rd quartile, maximum) for each data set. Legend: MOCK, mock-transfected; KBD, kinesin-binding domain; \*, W→R mutation; R<sub>2</sub>KR<sub>3</sub>, RBD<sub>2</sub>-KBD-RBD<sub>3</sub>.

| Hours of transfection and construct                                              | $n$ total | Mode    | Minimum | 1st Quartile (Q1) | Median  | 3rd Quartile (Q3) | Maximum |
|----------------------------------------------------------------------------------|-----------|---------|---------|-------------------|---------|-------------------|---------|
| <b>A. ABSOLUTE RETROGRADE VELOCITY (<math>\mu\text{m}/\text{second}</math>)</b>  |           |         |         |                   |         |                   |         |
| 8 hr MOCK                                                                        | 945       | --      | 0.30014 | 0.32956           | 0.3766  | 0.45648           | 1.42412 |
| 8 hr KBD*                                                                        | 1014      | 0.30673 | 0.30009 | 0.34161           | 0.41293 | 0.52509           | 2.03607 |
| 8 hr KBD                                                                         | 1490      | 0.31894 | 0.30033 | 0.34198           | 0.42065 | 0.5369            | 1.63384 |
| 10 hr MOCK                                                                       | 1114      | 0.77282 | 0.30012 | 0.33776           | 0.39477 | 0.49111           | 1.19824 |
| 10 hr KBD*                                                                       | 755       | --      | 0.30004 | 0.34333           | 0.41487 | 0.53418           | 1.75346 |
| 10 hr KBD                                                                        | 1900      | 0.72632 | 0.30008 | 0.34414           | 0.41216 | 0.52094           | 1.50841 |
| 12 hr MOCK                                                                       | 1059      | --      | 0.3     | 0.34205           | 0.41184 | 0.52168           | 1.40046 |
| 12 hr KBD*                                                                       | 1422      | 0.96166 | 0.30019 | 0.34346           | 0.41825 | 0.55064           | 1.42365 |
| 12 hr KBD                                                                        | 2476      | 0.68    | 0.30011 | 0.37339           | 0.49506 | 0.68141           | 3.82691 |
| 12 hr R <sub>2</sub> KR <sub>3</sub>                                             | 578       | --      | 0.30009 | 0.33268           | 0.39399 | 0.51459           | 2.07567 |
| 12 hr R* <sub>2</sub> KR* <sub>3</sub>                                           | 585       | --      | 0.30039 | 0.33934           | 0.40232 | 0.51865           | 1.241   |
| 12 hr R* <sub>2</sub> KR <sub>3</sub>                                            | 681       | 0.3     | 0.3     | 0.33345           | 0.38977 | 0.48754           | 1.28816 |
| 12 hr R <sub>2</sub> KR* <sub>3</sub>                                            | 619       | --      | 0.30021 | 0.34374           | 0.40535 | 0.56133           | 1.66425 |
| 15 hr MOCK                                                                       | 2205      | 0.96166 | 0.30006 | 0.36295           | 0.45726 | 0.63345           | 1.43795 |
| 15 hr R <sub>2</sub> KR <sub>3</sub>                                             | 744       | 0.30243 | 0.30021 | 0.33651           | 0.39334 | 0.49118           | 1.00894 |
| 15 hr R* <sub>2</sub> KR* <sub>3</sub>                                           | 1140      | 0.30117 | 0.3002  | 0.33673           | 0.39931 | 0.48669           | 1.13726 |
| 15 hr R* <sub>2</sub> KR <sub>3</sub>                                            | 1070      | 0.30492 | 0.30015 | 0.34121           | 0.40709 | 0.52158           | 1.17867 |
| 15 hr R <sub>2</sub> KR* <sub>3</sub>                                            | 535       | 0.308   | 0.30042 | 0.33452           | 0.39513 | 0.47948           | 1.40921 |
| <b>B. ABSOLUTE ANTEROGRADE VELOCITY (<math>\mu\text{m}/\text{second}</math>)</b> |           |         |         |                   |         |                   |         |
| 8 hr MOCK                                                                        | 913       | 0.96166 | 0.3005  | 0.33421           | 0.38298 | 0.47495           | 1.32322 |
| 8 hr KBD*                                                                        | 738       | 0.31081 | 0.30009 | 0.33148           | 0.39831 | 0.51034           | 1.49296 |
| 8 hr KBD                                                                         | 1515      | 0.31413 | 0.30006 | 0.34196           | 0.41955 | 0.53304           | 1.7296  |
| 10 hr MOCK                                                                       | 1086      | 0.96166 | 0.30003 | 0.33488           | 0.3937  | 0.49566           | 1.19971 |
| 10 hr KBD*                                                                       | 708       | --      | 0.30012 | 0.34729           | 0.40677 | 0.52514           | 1.41517 |
| 10 hr KBD                                                                        | 1698      | 0.9473  | 0.30012 | 0.34717           | 0.41793 | 0.52673           | 1.66921 |
| 12 hr MOCK                                                                       | 1081      | --      | 0.30013 | 0.34008           | 0.40906 | 0.52238           | 1.767   |
| 12 hr KBD*                                                                       | 1240      | 0.68    | 0.30004 | 0.34354           | 0.42141 | 0.539             | 1.23785 |
| 12 hr KBD                                                                        | 2316      | 0.68    | 0.30002 | 0.37129           | 0.49404 | 0.68136           | 3.65459 |
| 12 hr R <sub>2</sub> KR <sub>3</sub>                                             | 494       | --      | 0.30027 | 0.33199           | 0.38401 | 0.50964           | 2.09517 |
| 12 hr R* <sub>2</sub> KR* <sub>3</sub>                                           | 639       | --      | 0.30008 | 0.33626           | 0.40165 | 0.51794           | 1.4481  |
| 12 hr R* <sub>2</sub> KR <sub>3</sub>                                            | 599       | 0.30874 | 0.30021 | 0.33406           | 0.38394 | 0.49029           | 1.18274 |
| 12 hr R <sub>2</sub> KR* <sub>3</sub>                                            | 632       | --      | 0.30001 | 0.33834           | 0.40528 | 0.5319            | 1.70893 |
| 15 hr MOCK                                                                       | 2251      | 0.96166 | 0.30008 | 0.36044           | 0.45483 | 0.62517           | 1.45388 |

|                                        |      |         |         |         |         |         |         |
|----------------------------------------|------|---------|---------|---------|---------|---------|---------|
| 15 hr R <sub>2</sub> KR <sub>3</sub>   | 811  | 0.30779 | 0.30022 | 0.34276 | 0.4141  | 0.52203 | 1.37807 |
| 15 hr R* <sub>2</sub> KR* <sub>3</sub> | 1181 | 0.32303 | 0.30005 | 0.33891 | 0.3957  | 0.49266 | 1.17488 |
| 15 hr R* <sub>2</sub> KR <sub>3</sub>  | 1027 | 0.30051 | 0.30015 | 0.34526 | 0.41412 | 0.53774 | 1.1918  |
| 15 hr R <sub>2</sub> KR* <sub>3</sub>  | 633  | 0.30713 | 0.30007 | 0.33853 | 0.39843 | 0.50558 | 1.03573 |

**C. ABSOLUTE VELOCITY (µm/second)**

|                                        |      |         |         |         |         |         |         |
|----------------------------------------|------|---------|---------|---------|---------|---------|---------|
| 8 hr MOCK                              | 1858 | 0.96166 | 0.30014 | 0.33192 | 0.38026 | 0.46579 | 1.42412 |
| 8 hr KBD*                              | 1752 | 0.30673 | 0.30009 | 0.33807 | 0.4052  | 0.52023 | 2.03607 |
| 8 hr KBD                               | 3005 | 0.68    | 0.30006 | 0.34198 | 0.41998 | 0.53645 | 1.7296  |
| 10 hr MOCK                             | 2200 | 0.77282 | 0.30003 | 0.33649 | 0.39439 | 0.49428 | 1.19971 |
| 10 hr KBD*                             | 1463 | --      | 0.30004 | 0.34464 | 0.41083 | 0.53065 | 1.75346 |
| 10 hr KBD                              | 3598 | 0.72632 | 0.30008 | 0.34593 | 0.41522 | 0.52544 | 1.66921 |
| 12 hr MOCK                             | 2140 | --      | 0.3     | 0.34084 | 0.41017 | 0.52213 | 1.767   |
| 12 hr KBD*                             | 2662 | 0.96166 | 0.30004 | 0.34354 | 0.42051 | 0.54435 | 1.42365 |
| 12 hr KBD                              | 4792 | 0.68    | 0.30002 | 0.37221 | 0.49454 | 0.68136 | 3.82691 |
| 12 hr R <sub>2</sub> KR <sub>3</sub>   | 1072 | --      | 0.30009 | 0.33204 | 0.3891  | 0.51225 | 2.09517 |
| 12 hr R* <sub>2</sub> KR* <sub>3</sub> | 1224 | --      | 0.30008 | 0.338   | 0.402   | 0.51858 | 1.4481  |
| 12 hr R* <sub>2</sub> KR <sub>3</sub>  | 1280 | 0.3     | 0.3     | 0.33348 | 0.38682 | 0.48773 | 1.28816 |
| 12 hr R <sub>2</sub> KR* <sub>3</sub>  | 1251 | --      | 0.30001 | 0.34196 | 0.40535 | 0.54399 | 1.70893 |
| 15 hr MOCK                             | 4456 | 0.96166 | 0.30006 | 0.36127 | 0.45611 | 0.62963 | 1.45388 |
| 15 hr R <sub>2</sub> KR <sub>3</sub>   | 1555 | 0.30243 | 0.30021 | 0.33997 | 0.40285 | 0.50583 | 1.37807 |
| 15 hr R* <sub>2</sub> KR* <sub>3</sub> | 2321 | 0.30117 | 0.30005 | 0.33775 | 0.39705 | 0.49023 | 1.17488 |
| 15 hr R* <sub>2</sub> KR <sub>3</sub>  | 2097 | 0.30051 | 0.30015 | 0.34366 | 0.41104 | 0.5298  | 1.1918  |
| 15 hr R <sub>2</sub> KR* <sub>3</sub>  | 1168 | 0.30713 | 0.30007 | 0.33648 | 0.39692 | 0.49353 | 1.40921 |

**D. DURATION OF PAUSE (A-A) (Seconds)**

|                                        |     |     |     |      |      |      |      |
|----------------------------------------|-----|-----|-----|------|------|------|------|
| 8 hr MOCK                              | 210 | 0.5 | 0.5 | 1    | 2    | 4.5  | 34   |
| 8 hr KBD*                              | 163 | 0.5 | 0.5 | 1    | 3    | 6.5  | 44.5 |
| 8 hr KBD                               | 324 | 0.5 | 0.5 | 0.5  | 1.5  | 3    | 31.5 |
| 10 hr MOCK                             | 254 | 0.5 | 0.5 | 1    | 1.5  | 3.5  | 49.5 |
| 10 hr KBD*                             | 163 | 0.5 | 0.5 | 1    | 1.5  | 3.5  | 27   |
| 10 hr KBD                              | 354 | 0.5 | 0.5 | 0.5  | 1    | 2    | 15   |
| 12 hr MOCK                             | 276 | 0.5 | 0.5 | 0.5  | 1.5  | 3.5  | 37.5 |
| 12 hr KBD*                             | 263 | 0.5 | 0.5 | 0.5  | 1.5  | 3    | 27   |
| 12 hr KBD                              | 396 | 0.5 | 0.5 | 0.5  | 1    | 1.5  | 19.5 |
| 12 hr R <sub>2</sub> KR <sub>3</sub>   | 140 | 0.5 | 0.5 | 1.25 | 3    | 6.5  | 44.5 |
| 12 hr R* <sub>2</sub> KR* <sub>3</sub> | 144 | 0.5 | 0.5 | 1.25 | 3    | 7.25 | 39   |
| 12 hr R* <sub>2</sub> KR <sub>3</sub>  | 121 | 1.5 | 0.5 | 1.5  | 2.5  | 5    | 31.5 |
| 12 hr R <sub>2</sub> KR* <sub>3</sub>  | 175 | 0.5 | 0.5 | 1    | 3    | 6    | 38   |
| 15 hr MOCK                             | 438 | 0.5 | 0.5 | 0.5  | 1    | 2    | 12   |
| 15 hr R <sub>2</sub> KR <sub>3</sub>   | 176 | 0.5 | 0.5 | 1    | 1.75 | 4.5  | 34   |
| 15 hr R* <sub>2</sub> KR* <sub>3</sub> | 276 | 0.5 | 0.5 | 0.5  | 1.5  | 4    | 29   |

|                                        |     |     |     |     |     |   |    |
|----------------------------------------|-----|-----|-----|-----|-----|---|----|
| 15 hr R <sub>2</sub> KR <sub>3</sub>   | 201 | 0.5 | 0.5 | 0.5 | 1.5 | 3 | 31 |
| 15 hr R <sub>2</sub> KR <sub>3</sub> * | 166 | 0.5 | 0.5 | 1   | 3   | 6 | 32 |

**E. DURATION OF PAUSE (R-R) (Seconds)**

|                                        |     |     |     |     |     |      |      |
|----------------------------------------|-----|-----|-----|-----|-----|------|------|
| 8 hr MOCK                              | 233 | 1   | 0.5 | 1   | 2.5 | 5    | 33   |
| 8 hr KBD*                              | 278 | 0.5 | 0.5 | 1   | 2   | 4    | 51.5 |
| 8 hr KBD                               | 282 | 0.5 | 0.5 | 0.5 | 1.5 | 3.5  | 25   |
| 10 hr MOCK                             | 270 | 0.5 | 0.5 | 0.5 | 1.5 | 3.5  | 58   |
| 10 hr KBD*                             | 173 | 0.5 | 0.5 | 0.5 | 1.5 | 3    | 34.5 |
| 10 hr KBD                              | 466 | 0.5 | 0.5 | 0.5 | 1   | 2.5  | 29   |
| 12 hr MOCK                             | 232 | 0.5 | 0.5 | 0.5 | 1.5 | 3    | 24   |
| 12 hr KBD*                             | 354 | 0.5 | 0.5 | 0.5 | 1.5 | 3.5  | 40   |
| 12 hr KBD                              | 421 | 0.5 | 0.5 | 0.5 | 0.5 | 1.5  | 25   |
| 12 hr R <sub>2</sub> KR <sub>3</sub>   | 167 | 1   | 0.5 | 1   | 3   | 7    | 46   |
| 12 hr R <sub>2</sub> KR <sub>3</sub> * | 144 | 1   | 0.5 | 1   | 3   | 7.25 | 33.5 |
| 12 hr R <sub>2</sub> KR <sub>3</sub>   | 181 | 0.5 | 0.5 | 1   | 2.5 | 5.5  | 32   |
| 12 hr R <sub>2</sub> KR <sub>3</sub> * | 152 | 0.5 | 0.5 | 1   | 3   | 6.5  | 25.5 |
| 15 hr MOCK                             | 387 | 0.5 | 0.5 | 0.5 | 1   | 2    | 21   |
| 15 hr R <sub>2</sub> KR <sub>3</sub>   | 179 | 0.5 | 0.5 | 1   | 2   | 4.5  | 26.5 |
| 15 hr R <sub>2</sub> KR <sub>3</sub> * | 250 | 0.5 | 0.5 | 1   | 2   | 4.5  | 17.5 |
| 15 hr R <sub>2</sub> KR <sub>3</sub>   | 203 | 0.5 | 0.5 | 0.5 | 1.5 | 3.5  | 35   |
| 15 hr R <sub>2</sub> KR <sub>3</sub> * | 101 | 0.5 | 0.5 | 1   | 2   | 6    | 47.5 |

**F. DURATION OF PAUSE (R-A) (Seconds)**

|                                        |     |     |     |     |      |      |      |
|----------------------------------------|-----|-----|-----|-----|------|------|------|
| 8 hr MOCK                              | 354 | 0.5 | 0.5 | 1   | 2    | 5.5  | 60   |
| 8 hr KBD*                              | 231 | 0.5 | 0.5 | 1   | 2    | 6.5  | 59.5 |
| 8 hr KBD                               | 375 | 0.5 | 0.5 | 0.5 | 1    | 3    | 60   |
| 10 hr MOCK                             | 350 | 0.5 | 0.5 | 1   | 1.75 | 4.5  | 59.5 |
| 10 hr KBD*                             | 235 | 0.5 | 0.5 | 0.5 | 1.5  | 4    | 59.5 |
| 10 hr KBD                              | 495 | 0.5 | 0.5 | 0.5 | 1    | 2.5  | 59.5 |
| 12 hr MOCK                             | 338 | 0.5 | 0.5 | 1   | 2    | 5.5  | 60   |
| 12 hr KBD*                             | 424 | 0.5 | 0.5 | 0.5 | 1.5  | 4    | 34.5 |
| 12 hr KBD                              | 465 | 0.5 | 0.5 | 0.5 | 1    | 1.5  | 43   |
| 12 hr R <sub>2</sub> KR <sub>3</sub>   | 245 | 0.5 | 0.5 | 1.5 | 4    | 11.5 | 60   |
| 12 hr R <sub>2</sub> KR <sub>3</sub> * | 262 | 0.5 | 0.5 | 1.5 | 4    | 11.5 | 60   |
| 12 hr R <sub>2</sub> KR <sub>3</sub>   | 247 | 1   | 0.5 | 1.5 | 4    | 9    | 60   |
| 12 hr R <sub>2</sub> KR <sub>3</sub> * | 238 | 1   | 0.5 | 1.5 | 3.5  | 13.5 | 59.5 |
| 15 hr MOCK                             | 569 | 0.5 | 0.5 | 0.5 | 1    | 2    | 60   |
| 15 hr R <sub>2</sub> KR <sub>3</sub>   | 256 | 0.5 | 0.5 | 1   | 2    | 6.5  | 60   |
| 15 hr R <sub>2</sub> KR <sub>3</sub> * | 332 | 0.5 | 0.5 | 1   | 2    | 4    | 59   |
| 15 hr R <sub>2</sub> KR <sub>3</sub>   | 258 | 0.5 | 0.5 | 0.5 | 2    | 4.5  | 60   |
| 15 hr R <sub>2</sub> KR <sub>3</sub> * | 185 | 0.5 | 0.5 | 1   | 3    | 6.5  | 60   |

| <b>G. DURATION OF PAUSE (A-R) (Seconds)</b>    |      |     |     |      |     |      |      |
|------------------------------------------------|------|-----|-----|------|-----|------|------|
| 8 hr MOCK                                      | 369  | 0.5 | 0.5 | 1    | 2.5 | 6    | 60   |
| 8 hr KBD*                                      | 242  | 0.5 | 0.5 | 1    | 2.5 | 6.5  | 59.5 |
| 8 hr KBD                                       | 375  | 0.5 | 0.5 | 0.5  | 1.5 | 3.5  | 60   |
| 10 hr MOCK                                     | 351  | 0.5 | 0.5 | 1    | 2   | 4.5  | 59.5 |
| 10 hr KBD*                                     | 237  | 0.5 | 0.5 | 0.5  | 1.5 | 3.5  | 59.5 |
| 10 hr KBD                                      | 519  | 0.5 | 0.5 | 0.5  | 1   | 2.5  | 59.5 |
| 12 hr MOCK                                     | 328  | 0.5 | 0.5 | 0.75 | 2   | 6    | 60   |
| 12 hr KBD*                                     | 408  | 0.5 | 0.5 | 0.5  | 1.5 | 4    | 35.5 |
| 12 hr KBD                                      | 462  | 0.5 | 0.5 | 0.5  | 1   | 1.5  | 29   |
| 12 hr R <sub>2</sub> KR <sub>3</sub>           | 261  | 1   | 0.5 | 1.5  | 4.5 | 13.5 | 60   |
| 12 hr R* <sub>2</sub> KR* <sub>3</sub>         | 258  | 0.5 | 0.5 | 1.5  | 5   | 13   | 60   |
| 12 hr R* <sub>2</sub> KR <sub>3</sub>          | 243  | 1   | 0.5 | 1.5  | 3.5 | 10   | 60   |
| 12 hr R <sub>2</sub> KR* <sub>3</sub>          | 235  | 0.5 | 0.5 | 1    | 3   | 10.5 | 59.5 |
| 15 hr MOCK                                     | 560  | 0.5 | 0.5 | 0.5  | 1   | 2    | 60   |
| 15 hr R <sub>2</sub> KR <sub>3</sub>           | 247  | 0.5 | 0.5 | 0.5  | 2   | 5.5  | 60   |
| 15 hr R* <sub>2</sub> KR* <sub>3</sub>         | 325  | 0.5 | 0.5 | 1    | 2   | 6    | 59   |
| 15 hr R* <sub>2</sub> KR <sub>3</sub>          | 266  | 0.5 | 0.5 | 1    | 2   | 4.5  | 60   |
| 15 hr R <sub>2</sub> KR* <sub>3</sub>          | 189  | 0.5 | 0.5 | 1    | 2.5 | 8    | 60   |
| <b>H. ABSOLUTE DURATION OF PAUSE (Seconds)</b> |      |     |     |      |     |      |      |
| 8 hr MOCK                                      | 1241 | 0.5 | 0.5 | 1    | 2   | 4.5  | 60   |
| 8 hr KBD*                                      | 1094 | 0.5 | 0.5 | 1    | 2   | 5    | 59.5 |
| 8 hr KBD                                       | 1553 | 0.5 | 0.5 | 0.5  | 1.5 | 3    | 60   |
| 10 hr MOCK                                     | 1276 | 0.5 | 0.5 | 1    | 1.5 | 3.5  | 59.5 |
| 10 hr KBD*                                     | 816  | 0.5 | 0.5 | 0.5  | 1.5 | 3.5  | 59.5 |
| 10 hr KBD                                      | 1897 | 0.5 | 0.5 | 0.5  | 1   | 2.5  | 59.5 |
| 12 hr MOCK                                     | 1197 | 0.5 | 0.5 | 0.5  | 1.5 | 4    | 60   |
| 12 hr KBD*                                     | 1463 | 0.5 | 0.5 | 0.5  | 1.5 | 3.5  | 40   |
| 12 hr KBD                                      | 1976 | 0.5 | 0.5 | 0.5  | 1   | 1.5  | 43   |
| 12 hr R <sub>2</sub> KR <sub>3</sub>           | 763  | 0.5 | 0.5 | 1.5  | 3.5 | 8.5  | 60   |
| 12 hr R* <sub>2</sub> KR* <sub>3</sub>         | 863  | 0.5 | 0.5 | 1    | 3.5 | 9    | 60   |
| 12 hr R* <sub>2</sub> KR <sub>3</sub>          | 955  | 0.5 | 0.5 | 1    | 2.5 | 6.5  | 60   |
| 12 hr R <sub>2</sub> KR* <sub>3</sub>          | 863  | 0.5 | 0.5 | 1    | 3   | 7.5  | 59.5 |
| 15 hr MOCK                                     | 2039 | 0.5 | 0.5 | 0.5  | 1   | 2    | 60   |
| 15 hr R <sub>2</sub> KR <sub>3</sub>           | 936  | 0.5 | 0.5 | 0.5  | 1.5 | 4.5  | 60   |
| 15 hr R* <sub>2</sub> KR* <sub>3</sub>         | 1445 | 0.5 | 0.5 | 0.5  | 1.5 | 3.5  | 59   |
| 15 hr R* <sub>2</sub> KR <sub>3</sub>          | 1171 | 0.5 | 0.5 | 0.5  | 1.5 | 3.5  | 60   |
| 15 hr R <sub>2</sub> KR* <sub>3</sub>          | 819  | 0.5 | 0.5 | 1    | 2   | 4.5  | 60   |

**Supplementary Table 3.** Summary of persistency of motility of mitochondria represented as percentage after normalizing for total motile events. (A, B) Anterograde and retrograde persistency of motility in cells transfected with KBD (A) or R<sub>2</sub>KR<sub>3</sub> constructs (B). (C, D) Total persistency of mitochondria motility of cells transfected with KBD (C) or R<sub>2</sub>KR<sub>3</sub> constructs (D). Legend: MOCK, mock-transfected; KBD, kinesin-binding domain; \*, W→R mutation; R<sub>2</sub>KR<sub>3</sub>, RBD<sub>2</sub>-KBD-RBD<sub>3</sub>.

| <b>Table 3A</b>                          | <b>Anterograde</b> |            |          |            |          | <b>Retrograde</b> |            |          |            |          |
|------------------------------------------|--------------------|------------|----------|------------|----------|-------------------|------------|----------|------------|----------|
| <b>Persistence of motility (seconds)</b> | <b>1</b>           | <b>1.5</b> | <b>2</b> | <b>2.5</b> | <b>3</b> | <b>1</b>          | <b>1.5</b> | <b>2</b> | <b>2.5</b> | <b>3</b> |
| Hours of transfection and construct      |                    |            |          |            |          |                   |            |          |            |          |
| 12 hr KBD                                | 25                 | 27.27      | 23.86    | 5.68       | 1.14     | 35.23             | 29.55      | 13.64    | 11.36      | 1.14     |
| 12 hr KBD*                               | 44                 | 7          | 4        | 1          | 0        | 38.14             | 23.71      | 4.12     | 2.06       | 0        |
| 12 hr MOCK                               | 35.96              | 13.48      | 5.62     | 0          | 1.12     | 41.18             | 16.47      | 3.53     | 0          | 0        |
| 10 hr KBD                                | 51.09              | 19.57      | 7.61     | 1.09       | 0        | 41.57             | 25.84      | 7.87     | 3.37       | 2.25     |
| 10 hr KBD*                               | 28.33              | 13.33      | 11.67    | 1.67       | 0        | 40.35             | 17.54      | 7.02     | 1.75       | 1.75     |
| 10 hr MOCK                               | 30.61              | 16.33      | 3.06     | 2.04       | 3.06     | 29.9              | 14.43      | 7.22     | 3.09       | 0        |
| 8 hr KBD                                 | 37.62              | 21.78      | 1.98     | 0          | 0.99     | 38                | 13         | 7        | 0          | 3        |
| 8 hr KBD*                                | 30.85              | 14.89      | 4.26     | 2.13       | 0        | 25.77             | 16.49      | 5.15     | 4.12       | 0        |
| 8 hr MOCK                                | 27.72              | 10.89      | 1.98     | 2.97       | 0        | 35.58             | 7.69       | 1.92     | 0.96       | 0        |

| <b>Table 3B</b>                          | <b>Anterograde</b> |            |          |            |          |            | <b>Retrograde</b> |            |          |            |          |            |
|------------------------------------------|--------------------|------------|----------|------------|----------|------------|-------------------|------------|----------|------------|----------|------------|
| <b>Persistence of motility (seconds)</b> | <b>1 s</b>         | <b>1.5</b> | <b>2</b> | <b>2.5</b> | <b>3</b> | <b>3.5</b> | <b>1</b>          | <b>1.5</b> | <b>2</b> | <b>2.5</b> | <b>3</b> | <b>3.5</b> |
| 15 hr MOCK                               | 44.21              | 22.11      | 11.58    | 2.11       | 3.16     | 0          | 40                | 28.42      | 11.58    | 2.11       | 0        | 0          |
| 15 hr R <sub>2</sub> KR <sub>3</sub>     | 24.68              | 22.08      | 5.19     | 2.6        | 1.3      | 1.3        | 40.28             | 9.72       | 11.11    | 1.39       | 1.39     | 1.39       |
| 15 hr R <sub>2</sub> KR <sub>3</sub> *   | 25.26              | 20         | 13.68    | 2.11       | 1.05     | 0          | 35.71             | 12.24      | 5.1      | 3.06       | 2.04     | 0          |
| 15 hr R <sub>2</sub> KR <sub>3</sub> *   | 37.66              | 11.69      | 10.39    | 5.19       | 1.3      | 0          | 39.47             | 15.79      | 6.58     | 2.63       | 0        | 0          |
| 15 hr R <sub>2</sub> KR <sub>3</sub> *   | 33.33              | 11.59      | 8.7      | 1.45       | 0        | 0          | 36.62             | 11.27      | 2.82     | 4.23       | 1.41     | 0          |
| 12 hr MOCK                               | 35.96              | 13.48      | 5.62     | 0          | 1.12     | 0          | 41.18             | 16.47      | 3.53     | 0          | 0        | 1.18       |
| 12 hr R <sub>2</sub> KR <sub>3</sub>     | 17.2               | 6.45       | 1.08     | 0          | 0        | 0          | 30.21             | 9.38       | 2.08     | 0          | 0        | 0          |
| 12 hr R <sub>2</sub> KR <sub>3</sub> *   | 27.88              | 11.54      | 1.92     | 0.96       | 0        | 0          | 28.43             | 3.92       | 0.98     | 2.94       | 0        | 0.98       |
| 12 hr R <sub>2</sub> KR <sub>3</sub> *   | 20                 | 4.44       | 2.22     | 2.22       | 1.11     | 0          | 30.77             | 12.09      | 2.2      | 1.1        | 0        | 0          |
| 12 hr R <sub>2</sub> KR <sub>3</sub> *   | 28.42              | 8.42       | 1.05     | 1.05       | 0        | 2.11       | 26.09             | 9.78       | 5.43     | 1.09       | 0        | 4.35       |

**Table 3C.**

| <b>Total Persistency of motility (seconds)</b> |               |               |              |              |              |              |
|------------------------------------------------|---------------|---------------|--------------|--------------|--------------|--------------|
| <b>seconds</b>                                 | <b>&gt;10</b> | <b>7 - 10</b> | <b>5 - 7</b> | <b>3 - 5</b> | <b>2 - 3</b> | <b>2 - 1</b> |
| 12 hr KBD                                      | 1.136         | 5.6818        | 12.5         | 46.59        | 17.045       | 15.91        |
| 12 hr KBD*                                     | 0             | 1             | 4            | 18           | 21           | 55           |
| 12 hr MOCK                                     | 0             | 0             | 3.41         | 18.18        | 21.591       | 55.68        |
| 10 hr KBD                                      | 0             | 1.0753        | 4.3          | 25.81        | 35.484       | 32.26        |
| 10 hr KBD*                                     | 0             | 0             | 7.94         | 12.7         | 22.222       | 55.56        |
| 10 hr MOCK                                     | 0             | 1             | 1            | 18           | 18           | 61           |
| 8 hr KBD                                       | 0             | 2.9703        | 3.96         | 18.81        | 37.624       | 34.65        |
| 8 hr KBD*                                      | 0             | 0             | 0            | 14.43        | 28.866       | 55.67        |
| 8 hr MOCK                                      | 0             | 0             | 0.94         | 6.604        | 21.698       | 69.81        |

**Table 3D.**

| <b>Total Persistency of motility (seconds)</b> |               |               |              |              |              |              |
|------------------------------------------------|---------------|---------------|--------------|--------------|--------------|--------------|
| <b>seconds</b>                                 | <b>&gt;10</b> | <b>7 - 10</b> | <b>5 - 7</b> | <b>3 - 5</b> | <b>2 - 3</b> | <b>2 - 1</b> |
| 15 hr MOCK                                     | 0             | 0             | 1.25         | 11.25        | 26.25        | 63.75        |
| 15 hr $R_2KR_3$                                | 0             | 3.0303        | 2.02         | 11.11        | 23.232       | 63.64        |
| 15 hr $R_2^*KR_3^*$                            | 1.299         | 1.2987        | 2.6          | 19.48        | 29.87        | 49.35        |
| 15 hr $R_2^*KR_3$                              | 0             | 0             | 0            | 5.556        | 25           | 70.83        |
| 15 hr $R_2KR_3^*$                              | 0             | 0             | 3.41         | 18.18        | 28.409       | 55.68        |
| 12 hr MOCK                                     | 0             | 0             | 0            | 1.98         | 10.891       | 87.13        |
| 12 hr $R_2KR_3$                                | 0             | 0             | 0.91         | 2.727        | 13.636       | 83.64        |
| 12 hr $R_2^*KR_3^*$                            | 0             | 0             | 1.06         | 4.255        | 19.149       | 77.66        |
| 12 hr $R_2^*KR_3$                              | 0             | 0             | 0            | 14.43        | 13.402       | 72.16        |
| 12 hr $R_2KR_3^*$                              | 1.053         | 4.2105        | 7.37         | 25.26        | 42.105       | 31.58        |
